# Supplementary material for: An in vitro model for vitamin A transport across the human blood–brain barrier
Source: eLife journal article supplement (doi:10.7554/elife.87863), 2023-07-25
Supplement: fig2-data4 [file elife-87863-fig2-data4-v1.pdf]

CRBP1

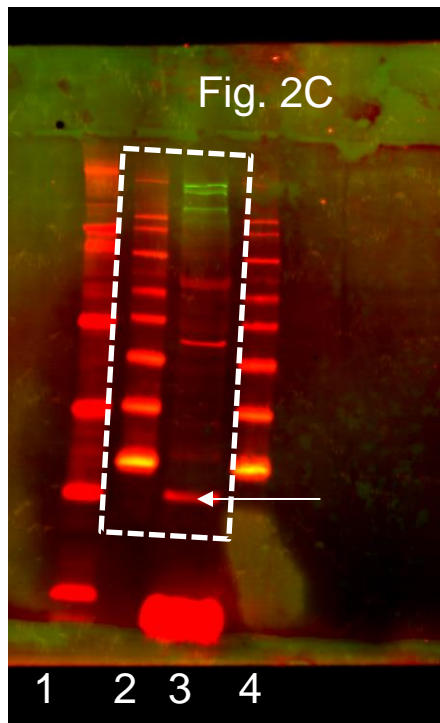

LRAT

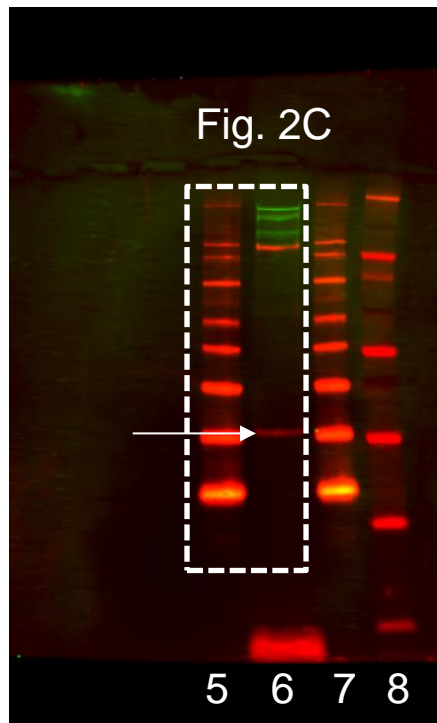

STRA6

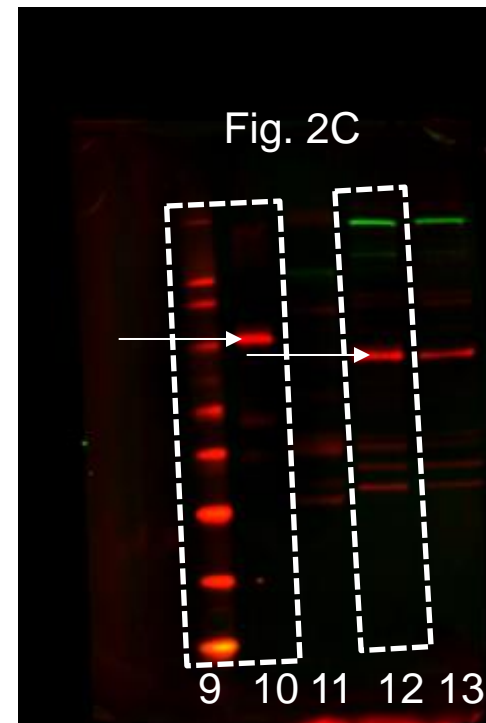

| Lane | Sample                                         |
|------|------------------------------------------------|
| 1    | Ladder                                         |
| 2    | Ladder                                         |
| 3    | BMEC Lysate                                    |
| 4    | Ladder                                         |
| 5    | Ladder                                         |
| 6    | BMEC Lysate                                    |
| 7    | Ladder                                         |
| 8    | Ladder                                         |
| 9    | Ladder                                         |
| 10   | Recombinant GST-STRA6                          |
| 11   | Schwann Cell Lysate (should not express STRA6) |
| 12   | BMEC Lysate                                    |
| 13   | BMEC Lysate                                    |
