# Supplementary material for: An in vitro model for vitamin A transport across the human blood–brain barrier
Source: eLife. 2023 Nov 7;12:RP87863. doi: 10.7554/eLife.87863 (PMC10629827; doi:10.7554/eLife.87863)
Supplement: Figure 4—source data 1. [file elife-87863-fig4-data1.xlsx]

## Sheet: 100 nM ROH Accumulation
100 nM ROHAccumulation Data
	ROH Accumulation Raw CPM and Concentrations used in Figures 4A - 4C, 5B, S1, S2
	Well #	Condition #	Replicate #	Vial #	Sample	Time (min)	Vol (uL)	3H CPM	3H DPM	3H-ROH Conc. (nM)	ROH Conc. (nM)	3H added (by DPM)	2.37644
	1	1	1	1	100 nM free ROH	0	100	0	0	0	0	ROH added (by concentration)	95
	2	1	1	2	100 nM free ROH	5	100	104	183	18.3804	734.77	Sum	97.3764
	3	1	1	3	100 nM free ROH	10	100	211	376	37.7651	1509.69	Ratio	39.9758
	4	1	1	4	100 nM free ROH	15	100	377	677	67.9973	2718.25
	5	1	1	5	100 nM free ROH	20	100	322	579	58.1542	2324.76		Time	Ave CPM Signal	CPM Std Dev	Ave [ROH] (uM)	Ave [ROH] Std Dev (uM)
	6	1	1	6	100 nM free ROH	25	100	522	942	94.6136	3782.26		0	0	0	0	0
	7	1	1	7	100 nM free ROH	30	100	562	1012	101.644	4063.32		5	144	39.0384	1.02921	0.285536
	8	1	1	8	100 nM free ROH	35	100	623	1128	113.295	4529.07		10	214.333	6.65833	1.54315	0.0545133
	9	1	1	9	100 nM free ROH	40	100	675	1227	123.239	4926.57		15	335.333	57.2917	2.42514	0.410978
	10	1	1	10	100 nM free ROH	45	100	787	1426	143.226	5725.58		20	397.667	72.7072	2.88287	0.539151
	11	1	1	11	100 nM free ROH	50	100	880	1592	159.899	6392.09		25	549.333	35.9073	3.98837	0.265647
	12	1	1	12	100 nM free ROH	55	100	877	1593	159.999	6396.11		30	638	65.8179	4.63079	0.491511
	13	1	2	13	100 nM free ROH	0	100	0	0	0	0		35	678.333	61.1583	4.93594	0.448229
	14	1	2	14	100 nM free ROH	5	100	182	325	32.6427	1304.92		40	686.333	17.0978	4.9975	0.126355
	15	1	2	15	100 nM free ROH	10	100	210	377	37.8655	1513.71		45	782	77.6209	5.69212	0.56086
	16	1	2	16	100 nM free ROH	15	100	359	648	65.0845	2601.81		50	884.333	5.85947	6.44161	0.0573944
	17	1	2	17	100 nM free ROH	20	100	404	728	73.1197	2923.02		55	868	10.1489	6.33588	0.0623317
	18	1	2	18	100 nM free ROH	25	100	590	1068	107.269	4288.16		60	965.667	58.9689	7.06128	0.447707
	19	1	2	19	100 nM free ROH	30	100	676	1222	122.737	4906.49		65	981.333	120.051	7.18308	0.899327
	20	1	2	20	100 nM free ROH	35	100	744	1349	135.492	5416.42		70	989.667	38.5919	7.25535	0.284622
	21	1	2	21	100 nM free ROH	40	100	678	1226	123.138	4922.56		75	1089.33	132.062	7.97673	0.97184
	22	1	2	22	100 nM free ROH	45	100	702	1274	127.959	5115.28		80	1211.67	25.7358	8.88148	0.198455
	23	1	2	23	100 nM free ROH	50	100	891	1620	162.711	6504.52		85	1195	24.3311	8.75433	0.173226
	24	1	2	24	100 nM free ROH	55	100	870	1579	158.593	6339.9		90	1212.67	108.408	8.86408	0.819229
	25	1	3	25	100 nM free ROH	0	100	0	0	0	0		95	1162.67	222.086	8.5161	1.61781
	26	1	3	26	100 nM free ROH	5	100	146	261	26.2146	1047.95		100	1238.33	164.318	9.04878	1.23268
	27	1	3	27	100 nM free ROH	10	100	222	400	40.1756	1606.05		105	1313.33	91.2433	9.61892	0.663182
	28	1	3	28	100 nM free ROH	15	100	270	487	48.9138	1955.37		110	1197	167.681	8.72221	1.24469
	29	1	3	29	100 nM free ROH	20	100	467	847	85.0719	3400.82		115	1130.67	56.0387	8.24575	0.417851
	30	1	3	30	100 nM free ROH	25	100	536	970	97.4259	3894.68		120	1297.67	105.879	9.5065	0.773832
	31	1	3	31	100 nM free ROH	30	100	676	1226	123.138	4922.56
	32	1	3	32	100 nM free ROH	35	100	668	1211	121.632	4862.33
	33	1	3	33	100 nM free ROH	40	100	706	1281	128.662	5143.39
	34	1	3	34	100 nM free ROH	45	100	857	1553	155.982	6235.5
	35	1	3	35	100 nM free ROH	50	100	882	1601	160.803	6428.23
	36	1	3	36	100 nM free ROH	55	100	857	1562	156.886	6271.64
	37	1	1	37	100 nM free ROH	60	100	899	1632	163.917	6552.7
	38	1	1	38	100 nM free ROH	65	100	846	1536	154.274	6167.25
	39	1	1	39	100 nM free ROH	70	100	977	1782	178.982	7154.97
	40	1	1	40	100 nM free ROH	75	100	955	1742	174.965	6994.36
	41	1	1	41	100 nM free ROH	80	100	1182	2155	216.446	8652.62
	42	1	1	42	100 nM free ROH	85	100	1207	2199	220.866	8829.28
	43	1	1	43	100 nM free ROH	90	100	1091	1978	198.669	7941.94
	44	1	1	44	100 nM free ROH	95	100	1028	1875	188.323	7528.38
	45	1	1	45	100 nM free ROH	100	100	1139	2067	207.608	8299.28
	46	1	1	46	100 nM free ROH	105	100	1364	2487	249.792	9985.64
	47	1	1	47	100 nM free ROH	110	100	1034	1873	188.122	7520.35
	48	1	1	48	100 nM free ROH	115	100	1066	1934	194.249	7765.27
	49	1	2	49	100 nM free ROH	60	100	987	1802	180.991	7235.27
	50	1	2	50	100 nM free ROH	65	100	1075	1962	197.061	7877.69
	51	1	2	51	100 nM free ROH	70	100	959	1752	175.969	7034.52
	52	1	2	52	100 nM free ROH	75	100	1219	2226	223.577	8937.69
	53	1	2	53	100 nM free ROH	80	100	1225	2238	224.783	8985.87
	54	1	2	54	100 nM free ROH	85	100	1211	2211	222.071	8877.46
	55	1	2	55	100 nM free ROH	90	100	1299	2368	237.84	9507.84
	56	1	2	56	100 nM free ROH	95	100	1041	1902	191.035	7636.79
	57	1	2	57	100 nM free ROH	100	100	1428	2608	261.945	10471.5
	58	1	2	58	100 nM free ROH	105	100	1208	2205	221.468	8853.37
	59	1	2	59	100 nM free ROH	110	100	1369	2492	250.294	10005.7
	60	1	2	60	100 nM free ROH	115	100	1161	2104	211.324	8447.84
	61	1	3	61	100 nM free ROH	60	100	1011	1842	185.009	7395.88
	62	1	3	62	100 nM free ROH	65	100	1023	1869	187.721	7504.29
	63	1	3	63	100 nM free ROH	70	100	1033	1887	189.529	7576.56
	64	1	3	64	100 nM free ROH	75	100	1094	1992	200.075	7998.15
	65	1	3	65	100 nM free ROH	80	100	1228	2243	225.285	9005.95
	66	1	3	66	100 nM free ROH	85	100	1167	2131	214.036	8556.25
	67	1	3	67	100 nM free ROH	90	100	1248	2277	228.7	9142.46
	68	1	3	68	100 nM free ROH	95	100	1419	2586	259.735	10383.1
	69	1	3	69	100 nM free ROH	100	100	1148	2086	209.516	8375.57
	70	1	3	70	100 nM free ROH	105	100	1368	2495	250.596	10017.8
	71	1	3	71	100 nM free ROH	110	100	1188	2152	216.145	8640.57
	72	1	3	72	100 nM free ROH	115	100	1165	2123	213.232	8524.13
	73	1	1	73	100 nM free ROH	120	100	1398	2550	256.12	10238.6
	74	1	2	74	100 nM free ROH	120	100	1187	2166	217.551	8696.78
	75	1	3	75	100 nM free ROH	120	100	1308	2387	239.748	9584.13
								60337	118703	11922.4	476609
								0	0	0	0
								0	0	0	0
								0	0	0	0
								0	0	0	0
								0	0	0	0
								0	0	0	0
								0	0	0	0
								0	0	0	0
								0	0	0	0
								0	0	0	0
								0	0	0	0
								0	0	0	0
								0	0	0	0
								0	0	0	0
								0	0	0	0
								0	0	0	0
								0	0	0	0
								0	0	0	0
								0	0	0	0
								0	0	0	0
	Condition 1 Vial Number			76		0	750		118703	2.37644

## Sheet: 400 nM ROH Accumulation
400 nM ROH Accumulation Data
	ROH Accumulation Raw CPM and Concentrations used in Figures 4A - 4C, 5A, S1, S2
	Well #	Condition #	Replicate #	Vial #	Sample	Time (min)	Vol (uL)	3H CPM	3H DPM	3H-ROH Conc. (nM)	ROH Conc. (nM)	3H added (by DPM)	14.1427
	1	1	1	1	400 nM free ROH	0	100	0	0	0	0	ROH added (by concentration)	380
	2	1	1	2	400 nM free ROH	5	100	1662	3003	301.619	8104.18	Sum	394.143
	3	1	1	3	400 nM free ROH	10	100	2901	5252	527.506	14173.5	Ratio	26.869
	4	1	1	4	400 nM free ROH	15	100	3214	5828	585.359	15728
	5	1	1	5	400 nM free ROH	20	100	3521	6369	639.697	17188		Time	Ave CPM Signal	CPM Std Dev	Ave [ROH] (uM)	Ave [ROH] Std Dev (uM)
	6	1	1	6	400 nM free ROH	25	100	3990	7246	727.782	19554.7		0	0	0	0	0
	7	1	1	7	400 nM free ROH	30	100	4979	9016	905.559	24331.4		5	2193.33	484.603	10.7336	2.4031
	8	1	1	8	400 nM free ROH	35	100	4887	8876	891.497	23953.6		10	3001	107.685	14.7016	0.561136
	9	1	1	9	400 nM free ROH	40	100	6222	11290	1133.96	30468.3		15	3469	301.66	17.0072	1.50047
	10	1	1	10	400 nM free ROH	45	100	5792	10518	1056.42	28384.9		20	3474.33	42.7707	17.0243	0.158198
	11	1	1	11	400 nM free ROH	50	100	6095	11058	1110.66	29842.2		25	4577.67	624.257	22.4774	3.12242
	12	1	1	12	400 nM free ROH	55	100	6588	11958	1201.05	32271		30	5465.33	423.316	26.8286	2.17234
	13	1	2	13	400 nM free ROH	0	100	0	0	0	0		35	5479.33	953.287	26.9168	4.69531
	14	1	2	14	400 nM free ROH	5	100	2307	4180	419.835	11280.5		40	6189.33	131.089	30.3639	0.678025
	15	1	2	15	400 nM free ROH	10	100	2987	5425	544.882	14640.4		45	6418.67	566.087	31.4902	2.82618
	16	1	2	16	400 nM free ROH	15	100	3391	6164	619.107	16634.8		50	6575.33	707.67	32.28	3.53798
	17	1	2	17	400 nM free ROH	20	100	3465	6304	633.168	17012.6		55	6466.67	113.918	31.662	0.566381
	18	1	2	18	400 nM free ROH	25	100	4510	8193	822.897	22110.4		60	7431	373.996	36.5475	1.90318
	19	1	2	19	400 nM free ROH	30	100	5666	10328	1037.33	27872.1		65	7422.67	518.198	36.57	2.62289
	20	1	2	20	400 nM free ROH	35	100	4972	9066	910.581	24466.4		70	7366	559.168	36.2957	2.76726
	21	1	2	21	400 nM free ROH	40	100	6045	10983	1103.12	29639.8		75	7332.33	15.6312	36.0645	0.0662327
	22	1	2	22	400 nM free ROH	45	100	6571	11922	1197.43	32173.9		80	7018	646.48	34.4875	3.13657
	23	1	2	23	400 nM free ROH	50	100	6243	11361	1141.09	30659.9		85	7554	35	37.1403	0.180557
	24	1	2	24	400 nM free ROH	55	100	6450	11696	1174.74	31563.9		90	6987	823.47	34.4381	4.01858
	25	1	3	25	400 nM free ROH	0	100	0	0	0	0		95	7282.33	493.533	35.8099	2.42319
	26	1	3	26	400 nM free ROH	5	100	2611	4749	476.985	12816.1		100	7740.33	1015.85	38.0858	5.04452
	27	1	3	27	400 nM free ROH	10	100	3115	5666	569.088	15290.8		105	8180.33	236.885	40.2546	1.083
	28	1	3	28	400 nM free ROH	15	100	3802	6914	694.436	18658.8		110	8495	1102.48	41.819	5.4858
	29	1	3	29	400 nM free ROH	20	100	3437	6252	627.945	16872.2		115	8929	671.366	43.9267	3.37298
	30	1	3	30	400 nM free ROH	25	100	5233	9548	958.992	25767.1		120	9596	380.793	47.2326	1.79999
	31	1	3	31	400 nM free ROH	30	100	5751	10480	1052.6	28282.3
	32	1	3	32	400 nM free ROH	35	100	6579	11980	1203.26	32330.4
	33	1	3	33	400 nM free ROH	40	100	6301	11481	1153.14	30983.7
	34	1	3	34	400 nM free ROH	45	100	6893	12566	1262.12	33911.8
	35	1	3	35	400 nM free ROH	50	100	7388	13465	1352.41	36337.9
	36	1	3	36	400 nM free ROH	55	100	6362	11543	1159.37	31151
	37	1	1	37	400 nM free ROH	60	100	7572	13786	1384.65	37204.2
	38	1	1	38	400 nM free ROH	65	100	7960	14560	1462.39	39293
	39	1	1	39	400 nM free ROH	70	100	7546	13816	1387.67	37285.2
	40	1	1	40	400 nM free ROH	75	100	7318	13340	1339.86	36000.6
	41	1	1	41	400 nM free ROH	80	100	6314	11518	1156.86	31083.6
	42	1	1	42	400 nM free ROH	85	100	7594	13838	1389.88	37344.6
	43	1	1	43	400 nM free ROH	90	100	6038	11043	1109.15	29801.7
	44	1	1	44	400 nM free ROH	95	100	6765	12327	1238.11	33266.8
	45	1	1	45	400 nM free ROH	100	100	6647	12097	1215.01	32646.1
	46	1	1	46	400 nM free ROH	105	100	7907	14453	1451.65	39004.2
	47	1	1	47	400 nM free ROH	110	100	7296	13284	1334.23	35849.5
	48	1	1	48	400 nM free ROH	115	100	8205	14920	1498.55	40264.5
	49	1	2	49	400 nM free ROH	60	100	7714	14094	1415.59	38035.4
	50	1	2	50	400 nM free ROH	65	100	6926	12621	1267.64	34060.2
	51	1	2	51	400 nM free ROH	70	100	7813	14241	1430.35	38432.1
	52	1	2	52	400 nM free ROH	75	100	7349	13389	1344.78	36132.8
	53	1	2	53	400 nM free ROH	80	100	7155	13013	1307.01	35118.1
	54	1	2	54	400 nM free ROH	85	100	7539	13711	1377.12	37001.8
	55	1	2	55	400 nM free ROH	90	100	7513	13681	1374.11	36920.9
	56	1	2	56	400 nM free ROH	95	100	7334	13366	1342.47	36070.8
	57	1	2	57	400 nM free ROH	100	100	7919	14452	1451.55	39001.6
	58	1	2	58	400 nM free ROH	105	100	8326	15154	1522.05	40896
	59	1	2	59	400 nM free ROH	110	100	8724	15922	1599.19	42968.6
	60	1	2	60	400 nM free ROH	115	100	9051	16530	1660.26	44609.4
	61	1	3	61	400 nM free ROH	60	100	7007	12748	1280.4	34403
	62	1	3	62	400 nM free ROH	65	100	7382	13472	1353.12	36356.8
	63	1	3	63	400 nM free ROH	70	100	6739	12291	1234.5	33169.7
	64	1	3	64	400 nM free ROH	75	100	7330	13362	1342.07	36060
	65	1	3	65	400 nM free ROH	80	100	7585	13807	1386.76	37260.9
	66	1	3	66	400 nM free ROH	85	100	7529	13738	1379.83	37074.7
	67	1	3	67	400 nM free ROH	90	100	7410	13559	1361.85	36591.6
	68	1	3	68	400 nM free ROH	95	100	7748	14115	1417.7	38092.1
	69	1	3	69	400 nM free ROH	100	100	8655	15789	1585.83	42609.7
	70	1	3	70	400 nM free ROH	105	100	8308	15142	1520.85	40863.7
	71	1	3	71	400 nM free ROH	110	100	9465	17282	1735.79	46638.9
	72	1	3	72	400 nM free ROH	115	100	9531	17381	1745.73	46906
	73	1	1	73	400 nM free ROH	120	100	9837	17936	1801.48	48403.8
	74	1	2	74	400 nM free ROH	120	100	9794	17836	1791.43	48133.9
	75	1	3	75	400 nM free ROH	120	100	9157	16734	1680.75	45160
								359205	706428	70953	1.90643e+06
								0	0	0	0
								0	0	0	0
								0	0	0	0
								0	0	0	0
								0	0	0	0
								0	0	0	0
								0	0	0	0
								0	0	0	0
								0	0	0	0
								0	0	0	0
								0	0	0	0
								0	0	0	0
								0	0	0	0
								0	0	0	0
								0	0	0	0
								0	0	0	0
								0	0	0	0
								0	0	0	0
								0	0	0	0
								0	0	0	0
	Condition 1 Vial Number			76		0	750		706428	14.1427

## Sheet: 2000 nM ROH Accumulation
2000 nM ROH Accumulation Data
	ROH Accumulation Raw CPM and Concentrations used in Figures 4A - 4C, 5A, 5B, S1, S2
	Well #	Condition #	Replicate #	Vial #	Sample	Time (min)	Vol (uL)	3H CPM	3H DPM	3H-ROH Conc. (nM)	ROH Conc. (nM)	3H added (by DPM)	77.7987
	1	1	1	1	2000 nM free ROH	0	100	0	0	0	0	ROH added (by concentration)	1900
	2	1	1	2	2000 nM free ROH	5	100	10967	19846	1993.31	48680.7	Sum	1977.8
	3	1	1	3	2000 nM free ROH	10	100	15783	28641	2876.68	70254.2	Ratio	24.422
	4	1	1	4	2000 nM free ROH	15	100	20050	36370	3652.97	89212.9
	5	1	1	5	2000 nM free ROH	20	100	27628	50265	5048.57	123296		Time	Ave CPM Signal	CPM Std Dev	Ave [ROH] (uM)	Ave [ROH] Std Dev (uM)
	6	1	1	6	2000 nM free ROH	25	100	33517	60726	6099.26	148956		0	0	0	0	0
	7	1	1	7	2000 nM free ROH	30	100	35126	63939	6421.97	156838		5	11236.3	292.804	50.1173	1.46003
	8	1	1	8	2000 nM free ROH	35	100	40679	74103	7442.84	181769		10	14998	797.271	66.8405	3.41079
	9	1	1	9	2000 nM free ROH	40	100	43249	78739	7908.47	193141		15	20442	347.454	91.2823	1.88149
	10	1	1	10	2000 nM free ROH	45	100	49380	89544	8993.72	219645		20	25662	1706.83	114.668	7.50417
	11	1	1	11	2000 nM free ROH	50	100	47565	86351	8673.02	211812		25	31675.7	1821.82	141.369	7.93603
	12	1	1	12	2000 nM free ROH	55	100	46786	84950	8532.3	208376		30	34596.3	592.799	154.856	2.3014
	13	1	2	13	2000 nM free ROH	0	100	0	0	0	0		35	39059.3	1461.51	174.885	6.21515
	14	1	2	14	2000 nM free ROH	5	100	11548	21036	2112.84	51599.7		40	44758.3	2367.54	200.144	11.1277
	15	1	2	15	2000 nM free ROH	10	100	15022	27247	2736.66	66834.8		45	46534.3	4238.57	207.698	19.0221
	16	1	2	16	2000 nM free ROH	15	100	20564	37402	3756.62	91744.3		50	49150	1443.75	219.633	6.96233
	17	1	2	17	2000 nM free ROH	20	100	24559	44708	4490.43	109665		55	51813.7	4359.62	231.757	20.2606
	18	1	2	18	2000 nM free ROH	25	100	29874	54272	5451.03	133125		60	57000.3	581.698	255.609	3.09892
	19	1	2	19	2000 nM free ROH	30	100	33956	62102	6237.47	152331		65	60753.3	3174.42	272.544	14.1945
	20	1	2	20	2000 nM free ROH	35	100	37839	69177	6948.07	169686		70	57555	8427.29	257.452	38.0734
	21	1	2	21	2000 nM free ROH	40	100	43539	79218	7956.58	194316		75	60735.7	326.204	272.365	2.06477
	22	1	2	22	2000 nM free ROH	45	100	41663	75731	7606.35	185762		80	65670.3	2948.45	294.706	13.2656
	23	1	2	23	2000 nM free ROH	50	100	50390	91791	9219.4	225156		85	66695.3	5328.29	299.442	24.4644
	24	1	2	24	2000 nM free ROH	55	100	54547	99530	9996.7	244140		90	67101.3	1398.47	301.115	6.10561
	25	1	3	25	2000 nM free ROH	0	100	0	0	0	0		95	70160.3	1973.15	315.129	8.44583
	26	1	3	26	2000 nM free ROH	5	100	11194	20413	2050.26	50071.5		100	69674.3	2887.91	312.947	12.8438
	27	1	3	27	2000 nM free ROH	10	100	14189	25860	2597.35	63432.6		105	73794.7	1098.04	331.222	4.05441
	28	1	3	28	2000 nM free ROH	15	100	20712	37869	3803.53	92889.8		110	71068.3	2327.51	318.51	9.99069
	29	1	3	29	2000 nM free ROH	20	100	24799	45269	4546.78	111041		115	77200.3	2881.68	345.258	12.9624
	30	1	3	30	2000 nM free ROH	25	100	31636	57901	5815.52	142027		120	71109.3	540.957	318.52	2.13283
	31	1	3	31	2000 nM free ROH	30	100	34707	63352	6363.02	155398
	32	1	3	32	2000 nM free ROH	35	100	38660	70610	7092	173201
	33	1	3	33	2000 nM free ROH	40	100	47487	86825	8720.62	212975
	34	1	3	34	2000 nM free ROH	45	100	48560	88746	8913.57	217687
	35	1	3	35	2000 nM free ROH	50	100	49495	90476	9087.33	221931
	36	1	3	36	2000 nM free ROH	55	100	54108	98966	9940.05	242756
	37	1	1	37	2000 nM free ROH	60	100	57437	105096	10555.7	257793
	38	1	1	38	2000 nM free ROH	65	100	58107	106173	10663.9	260434
	39	1	1	39	2000 nM free ROH	70	100	48314	87917	8830.3	215654
	40	1	1	40	2000 nM free ROH	75	100	60365	110103	11058.6	270074
	41	1	1	41	2000 nM free ROH	80	100	66007	120506	12103.5	295592
	42	1	1	42	2000 nM free ROH	85	100	69878	127786	12834.7	313449
	43	1	1	43	2000 nM free ROH	90	100	68160	124572	12511.9	305566
	44	1	1	44	2000 nM free ROH	95	100	67977	124653	12520	305764
	45	1	1	45	2000 nM free ROH	100	100	69216	126521	12707.7	310346
	46	1	1	46	2000 nM free ROH	105	100	73806	135178	13577.2	331581
	47	1	1	47	2000 nM free ROH	110	100	68592	125398	12594.9	307592
	48	1	1	48	2000 nM free ROH	115	100	74988	136384	13698.3	334540
	49	1	2	49	2000 nM free ROH	60	100	57224	104762	10522.2	256973
	50	1	2	50	2000 nM free ROH	65	100	59880	109679	11016.1	269034
	51	1	2	51	2000 nM free ROH	70	100	59535	108667	10914.4	266552
	52	1	2	52	2000 nM free ROH	75	100	60979	111737	11222.8	274082
	53	1	2	53	2000 nM free ROH	80	100	62568	114565	11506.8	281019
	54	1	2	54	2000 nM free ROH	85	100	60544	110559	11104.4	271193
	55	1	2	55	2000 nM free ROH	90	100	65516	119920	12044.7	294155
	56	1	2	56	2000 nM free ROH	95	100	70688	129418	12998.6	317453
	57	1	2	57	2000 nM free ROH	100	100	67043	122956	12349.6	301602
	58	1	2	58	2000 nM free ROH	105	100	74887	136606	13720.6	335084
	59	1	2	59	2000 nM free ROH	110	100	73211	133390	13397.6	327196
	60	1	2	60	2000 nM free ROH	115	100	76154	139250	13986.1	341570
	61	1	3	61	2000 nM free ROH	60	100	56340	102760	10321.1	252062
	62	1	3	62	2000 nM free ROH	65	100	64273	117478	11799.4	288165
	63	1	3	63	2000 nM free ROH	70	100	64816	118288	11880.7	290151
	64	1	3	64	2000 nM free ROH	75	100	60863	111271	11176	272939
	65	1	3	65	2000 nM free ROH	80	100	68436	125363	12591.3	307506
	66	1	3	66	2000 nM free ROH	85	100	69664	127881	12844.3	313682
	67	1	3	67	2000 nM free ROH	90	100	67628	123781	12432.5	303625
	68	1	3	68	2000 nM free ROH	95	100	71816	131341	13191.8	322170
	69	1	3	69	2000 nM free ROH	100	100	72764	133266	13385.1	326891
	70	1	3	70	2000 nM free ROH	105	100	72691	133310	13389.5	326999
	71	1	3	71	2000 nM free ROH	110	100	71402	130759	13133.3	320742
	72	1	3	72	2000 nM free ROH	115	100	80459	146627	14727.1	359665
	73	1	1	73	2000 nM free ROH	120	100	70556	128982	12954.8	316383
	74	1	2	74	2000 nM free ROH	120	100	71135	129856	13042.6	318527
	75	1	3	75	2000 nM free ROH	120	100	71637	130721	13129.5	320649
								*****	3886044	390311	9.53217e+06
								0	0	0	0
								0	0	0	0
								0	0	0	0
								0	0	0	0
								0	0	0	0
								0	0	0	0
								0	0	0	0
								0	0	0	0
								0	0	0	0
								0	0	0	0
								0	0	0	0
								0	0	0	0
								0	0	0	0
								0	0	0	0
								0	0	0	0
								0	0	0	0
								0	0	0	0
								0	0	0	0
								0	0	0	0
								0	0	0	0
	Condition 1 Vial Number			76		0	750		3886044	77.7987

## Sheet: Basolateral Accum Permeability
	ROH Permeability Raw CPM used in Figures 3C, 3D, 4C, 4D, 4E, 4F, 5D, 7B, 7C																					Sucrose Permeability Raw CPM used in Figures 3C, 3D, 4C, 4D, 4E, 4F, 5D, 7B, 7C
	Using CPM for mass balance											CPM * 10^-3										Using CPM for mass balance											CPM * 10^-3
			Apical, t = 0	Basolateral, t = 0	Basolateral, t = 15	Basolateral, t = 30	Basolateral, t = 45	Basolateral, t = 60	Apical, t = 60	RIPA CPM		Apical, t = 0	Basolateral, t = 0	Basolateral, t = 15	Basolateral, t = 30	Basolateral, t = 45	Basolateral, t = 60	Apical, t = 60	RIPA CPM					Apical, t = 0	Basolateral, t = 0	Basolateral, t = 15	Basolateral, t = 30	Basolateral, t = 45	Basolateral, t = 60	Apical, t = 60	RIPA CPM		Apical, t = 0	Basolateral, t = 0	Basolateral, t = 15	Basolateral, t = 30	Basolateral, t = 45	Basolateral, t = 60	Apical, t = 60	RIPA CPM
	1	100 nM ROH	227220	0	0	1180	3038	4053.8	218210	7333		227.22	0	0	1.18	3.038	4.0538	218.21	7.333			1	100 nM ROH	590780	110	1050	1775	2317.5	2481.75	603220	6703		590.78	0.11	1.05	1.775	2.3175	2.48175	603.22	6.703
	2		235000	0	0	1260	3326	4772.6	218080	7255		235	0	0	1.26	3.326	4.7726	218.08	7.255			2		608260	110	690	1339	1983.9	2278.39	602210	5862		608.26	0.11	0.69	1.339	1.9839	2.27839	602.21	5.862
	3		238900	0	0	1050	3845	4684.5	218610	8234		238.9	0	0	1.05	3.845	4.6845	218.61	8.234			3		612020	110	1080	1778	2357.8	2745.78	600110	8727		612.02	0.11	1.08	1.778	2.3578	2.74578	600.11	8.727
	4		233220	0	0	1760	4166	4976.6	219940	8827		233.22	0	0	1.76	4.166	4.9766	219.94	8.827			4		604470	110	1180	2038	2433.8	2753.38	599490	11877		604.47	0.11	1.18	2.038	2.4338	2.75338	599.49	11.877
	5	400 nM ROH	326570	0	630	2733	5403.3	7810.33	295660	13700		326.57	0	0.63	2.733	5.4033	7.81033	295.66	13.7			5	400 nM ROH	659440	100	1040	1744	2304.4	2770.44	657390	5840		659.44	0.1	1.04	1.744	2.3044	2.77044	657.39	5.84
	6		326870	0	510	2841	5934.1	8983.41	291440	13428		326.87	0	0.51	2.841	5.9341	8.98341	291.44	13.428			6		665840	100	2150	3245	3794.5	4249.45	647030	4317		665.84	0.1	2.15	3.245	3.7945	4.24945	647.03	4.317
	7		327870	0	1050	3385	6058.5	9275.85	292720	13441		327.87	0	1.05	3.385	6.0585	9.27585	292.72	13.441			7		666920	100	1400	2170	2687	3208.7	645730	3942		666.92	0.1	1.4	2.17	2.687	3.2087	645.73	3.942
	8		333210	0	1210	4081	7628.1	10262.8	300920	15282		333.21	0	1.21	4.081	7.6281	10.2628	300.92	15.282			8		666630	100	1590	2379	3167.9	3626.79	663050	5426		666.63	0.1	1.59	2.379	3.1679	3.62679	663.05	5.426
	9	2000 nM ROH	1552980	0	6270	23167	37286.7	58018.7	1171460	164429	`	1552.98	0	6.27	23.167	37.2867	58.0187	1171.46	164.429			9	2000 nM ROH	649770	90	1250	2265	2836.5	3353.65	631680	4388	`	649.77	0.09	1.25	2.265	2.8365	3.35365	631.68	4.388
	10		1537160	0	5410	19661	37406.1	57200.6	1161600	171933		1537.16	0	5.41	19.661	37.4061	57.2006	1161.6	171.933			10		645770	90	1010	2031	2733.1	3333.31	633230	5153		645.77	0.09	1.01	2.031	2.7331	3.33331	633.23	5.153
	11		1545320	0	5570	21887	37988.7	63138.9	1206340	169632		1545.32	0	5.57	21.887	37.9887	63.1389	1206.34	169.632			11		646950	90	860	1776	2367.6	3146.76	634520	4549		646.95	0.09	0.86	1.776	2.3676	3.14676	634.52	4.549
	12		1547170	0	6150	23445	43114.5	65651.4	1173190	184563		1547.17	0	6.15	23.445	43.1145	65.6514	1173.19	184.563			12		648130	90	960	1866	2556.6	3225.66	628080	5639		648.13	0.09	0.96	1.866	2.5566	3.22566	628.08	5.639
	13	ROH-RBP	1799840	0	11810	29461	47446.1	60684.6	1675540	49505		1799.84	0	11.81	29.461	47.4461	60.6846	1675.54	49.505			13	ROH-RBP	663970	100	1490	2889	3838.9	4363.89	678580	5134		663.97	0.1	1.49	2.889	3.8389	4.36389	678.58	5.134
	14		1840650	0	15650	29595	44629.5	62442.9	1688630	53723		1840.65	0	15.65	29.595	44.6295	62.4429	1688.63	53.723			14		663640	100	2210	3521	4412.1	5161.21	668090	6181		663.64	0.1	2.21	3.521	4.4121	5.16121	668.09	6.181
	15		1848140	0	16230	30003	47690.3	62709	1681030	54534		1848.14	0	16.23	30.003	47.6903	62.709	1681.03	54.534			15		670710	100	2040	3164	4116.4	4551.64	667150	5375		670.71	0.1	2.04	3.164	4.1164	4.55164	667.15	5.375
	16		1819800	0	15950	31545	49524.5	66052.4	1680830	63903		1819.8	0	15.95	31.545	49.5245	66.0524	1680.83	63.903			16		662580	100	2040	3294	4339.4	4973.94	680760	9012		662.58	0.1	2.04	3.294	4.3394	4.97394	680.76	9.012
	17	L63R/L64S RBP	1534630	0	9960	28486	43108.6	59510.9	1427660	67419		1534.63	0	9.96	28.486	43.1086	59.5109	1427.66	67.419			17	L63R/L64S RBP	639320	100	1590	3309	4200.9	5060.09	664000	5321		639.32	0.1	1.59	3.309	4.2009	5.06009	664	5.321
	18		1594580	0	13600	27710	43811	59611.1	1436750	70313		1594.58	0	13.6	27.71	43.811	59.6111	1436.75	70.313			18		651860	100	1920	3112	4161.2	4826.12	660140	5105		651.86	0.1	1.92	3.112	4.1612	4.82612	660.14	5.105
	19		1596380	0	15050	32705	47340.5	62004.1	1457580	83017		1596.38	0	15.05	32.705	47.3405	62.004	1457.58	83.017			19		654170	100	2140	3754	4505.4	5010.54	662850	5135		654.17	0.1	2.14	3.754	4.5054	5.01054	662.85	5.135
	20		1555790	0	13970	29807	44820.7	62052.1	1441910	74773		1555.79	0	13.97	29.807	44.8207	62.0521	1441.91	74.773			20		642950	100	2520	3992	4989.2	5568.92	662280	5701		642.95	0.1	2.52	3.992	4.9892	5.56892	662.28	5.701
	21	ROH-RBP-TTR	843250	0	6930	18583	30918.3	38361.8	755650	23944		843.25	0	6.93	18.583	30.9183	38.3618	755.65	23.944			21	ROH-RBP-TTR	656360	110	1120	2212	2961.2	3376.12	656310	8041		656.36	0.11	1.12	2.212	2.9612	3.37612	656.31	8.041
	22		842470	0	6090	16509	28110.9	36951.1	798550	27372		842.47	0	6.09	16.509	28.1109	36.9511	798.55	27.372			22		650940	110	1020	2172	2977.2	3417.72	668700	8644		650.94	0.11	1.02	2.172	2.9772	3.41772	668.7	8.644
	23		826470	0	6970	17557	28635.7	36473.6	778790	23654		826.47	0	6.97	17.557	28.6357	36.4736	778.79	23.654			23		657110	110	1120	2232	2963.2	3346.32	666450	7470		657.11	0.11	1.12	2.232	2.9632	3.34632	666.45	7.47
	24		842340	0	5900	16650	28085	36418.5	795800	23153		842.34	0	5.9	16.65	28.085	36.4185	795.8	23.153			24		650990	110	1080	2388	3168.8	3626.88	670190	6766		650.99	0.11	1.08	2.388	3.1688	3.62688	670.19	6.766
	25	ROH-RBP-I84A TTR	717360	0	5320	16042	28044.2	35874.4	681120	16555		717.36	0	5.32	16.042	28.0442	35.8744	681.12	16.555			25	ROH-RBP-I84A TTR	602460	110	780	1638	2463.8	2766.38	619320	5587		602.46	0.11	0.78	1.638	2.4638	2.76638	619.32	5.587
	26		724060	0	5530	17323	28372.3	36397.2	679060	15124		724.06	0	5.53	17.323	28.3723	36.3972	679.06	15.124			26		598840	110	960	2166	2806.6	3220.66	620440	4950		598.84	0.11	0.96	2.166	2.8066	3.22066	620.44	4.95
	27		736880	0	5980	16658	26895.8	37129.6	683530	15020		736.88	0	5.98	16.658	26.8958	37.1296	683.53	15.02			27		611350	110	860	1866	2416.6	3031.66	616410	5521		611.35	0.11	0.86	1.866	2.4166	3.03166	616.41	5.521
	28		731620	0	5570	17177	27787.7	37708.8	679600	15338		731.62	0	5.57	17.177	27.7877	37.7088	679.6	15.338			28		606020	110	750	1655	2185.5	2678.55	614020	5150		606.02	0.11	0.75	1.655	2.1855	2.67855	614.02	5.15
		Permeability Calculations																					Permeability Calculations
		Sample #	0	15	30	45	60	Slope (uL/min)	Slope cm3 / s	Peapp (cm/s)	Ave Pe (10^-6 cm/s)	Error											Sample #	0	15	30	45	60	Slope (uL/min)	Slope cm3 / s	Peapp (cm/s)	Ave Pe (10^-6 cm/s)	Error
		1	0	0	2.70382	6.96118	9.28876	0.219498	3.6583e-06	3.26634e-06	3.75293	0.386568	100										1	0.0911773	0.870329	1.47127	1.92094	2.05709	0.0267329	4.45549e-07	3.97811e-07	0.431931	0.0275093	100
		2	0	0	2.88885	7.62564	10.9423	0.268449	4.47415e-06	3.99478e-06													2	0.0913303	0.57289	1.11174	1.64718	1.89169	0.0299456	4.99094e-07	4.4562e-07
		3	0	0	2.40154	8.7942	10.7143	0.277092	4.61819e-06	4.12339e-06													3	0.0916499	0.899835	1.4814	1.96447	2.28773	0.0309784	5.16307e-07	4.60989e-07
		4	0	0	4.00109	9.47076	11.3135	0.243748	4.06247e-06	3.62721e-06													4	0.0917446	0.98417	1.69978	2.02989	2.29644	0.0284461	4.74101e-07	4.23305e-07
		5	0	1.06541	4.62186	9.13769	13.2083	0.272963	4.54939e-06	4.06195e-06	4.6528	0.430694	400										5	0.0760584	0.791007	1.32646	1.75269	2.10715	0.0291644	4.86074e-07	4.33994e-07	0.48291	0.0445802	400
		6	0	0.874966	4.87407	10.1807	15.4121	0.32612	5.43533e-06	4.85298e-06													6	0.0772762	1.66144	2.50761	2.93224	3.28381	0.0352784	5.87973e-07	5.24976e-07
		7	0	1.79352	5.78198	10.3486	15.8442	0.311459	5.19098e-06	4.6348e-06													7	0.0774317	1.08404	1.68027	2.08059	2.48455	0.030679	5.11316e-07	4.56532e-07
		8	0	2.0105	6.78087	12.6746	17.0524	0.340129	5.66882e-06	5.06145e-06													8	0.0754091	1.199	1.79398	2.38888	2.73493	0.0346845	5.78075e-07	5.16139e-07
		9	0	2.67615	9.88809	15.9146	24.7634	0.481922	8.03203e-06	7.17146e-06	7.67661	0.5281	2000										9	0.0712386	0.989425	1.79284	2.2452	2.65455	0.0363182	6.05304e-07	5.4045e-07	0.578828	0.0266697	2000
		10	0	2.32868	8.4629	16.1011	24.6215	0.496777	8.27962e-06	7.39252e-06													10	0.0710642	0.797499	1.60368	2.15806	2.63199	0.0403857	6.73095e-07	6.00978e-07
		11	0	2.30864	9.07165	15.7454	26.1696	0.521711	8.69519e-06	7.76356e-06													11	0.0709198	0.677678	1.39948	1.86566	2.47964	0.0391471	6.52451e-07	5.82546e-07
		12	0	2.62106	9.99199	18.3749	27.9799	0.563063	9.38438e-06	8.37891e-06													12	0.0716469	0.764234	1.48548	2.03525	2.56787	0.0397379	6.62299e-07	5.91338e-07
		13	0	3.52424	8.79149	14.1585	18.109	0.327474	5.45791e-06	4.87313e-06	4.76027	0.190254	RBP										13	0.0736833	1.09788	2.12871	2.82863	3.21546	0.0470176	7.83627e-07	6.99667e-07	0.692932	0.0424861	RBP
		14	0	4.63393	8.76302	13.2147	18.4892	0.306784	5.11307e-06	4.56524e-06													14	0.0748402	1.65397	2.63512	3.30203	3.86266	0.0486198	8.10331e-07	7.2351e-07
		15	0	4.8274	8.92399	14.1848	18.652	0.311564	5.19273e-06	4.63636e-06													15	0.0749457	1.52889	2.37128	3.08506	3.41126	0.0424059	7.06764e-07	6.3104e-07
		16	0	4.74468	9.38376	14.7322	19.6488	0.333738	5.56229e-06	4.96633e-06													16	0.0734473	1.49833	2.41935	3.18717	3.65323	0.0482168	8.03613e-07	7.17512e-07
		17	0	3.48823	9.97646	15.0976	20.8421	0.381219	6.35364e-06	5.6729e-06	5.4412	0.174897	L63R/L64S										17	0.0753012	1.19729	2.49172	3.16333	3.81031	0.0567378	9.4563e-07	8.44313e-07	0.759668	0.0613952	L63R/L64S
		18	0	4.7329	9.64329	15.2466	20.7451	0.357599	5.95999e-06	5.32142e-06													18	0.0757415	1.45424	2.35708	3.15176	3.65538	0.0493206	8.22011e-07	7.33938e-07
		19	0	5.16267	11.2189	16.2394	21.2695	0.355607	5.92678e-06	5.29177e-06													19	0.0754318	1.61424	2.83171	3.39851	3.77954	0.0470847	7.84744e-07	7.00665e-07
		20	0	4.84427	10.3359	15.5421	21.5173	0.368169	6.13615e-06	5.4787e-06													20	0.0754968	1.90252	3.01383	3.76668	4.20435	0.0510557	8.50929e-07	7.59758e-07
		21	0	4.58546	12.296	20.4581	25.3833	0.470371	7.83952e-06	6.99957e-06	6.55846	0.298774	TTR										21	0.0838019	0.853255	1.68518	2.25595	2.57205	0.0381809	6.36349e-07	5.68169e-07	0.584077	0.031284	TTR
		22	0	3.81316	10.3369	17.6012	23.1364	0.434893	7.24822e-06	6.47162e-06													22	0.0822491	0.762674	1.62405	2.22611	2.5555	0.0398702	6.64503e-07	5.93306e-07
		23	0	4.47489	11.272	18.3847	23.4168	0.426257	7.10428e-06	6.34311e-06													23	0.0825268	0.840273	1.67454	2.22312	2.51056	0.0370628	6.17714e-07	5.5153e-07
		24	0	3.70696	10.4612	17.6458	22.8817	0.431392	7.18986e-06	6.41952e-06													24	0.0820663	0.805742	1.78158	2.36411	2.70586	0.0418858	6.98097e-07	6.23301e-07
		25	0	3.90533	11.7762	20.5868	26.3349	0.507328	8.45547e-06	7.54953e-06	7.61428	0.13305	I84A										25	0.0888071	0.629723	1.32242	1.98912	2.2334	0.0365182	6.08637e-07	5.43426e-07	0.553917	0.0355567	I84A
		26	0	4.07181	12.7551	20.8909	26.7997	0.508796	8.47994e-06	7.57138e-06													26	0.0886468	0.773645	1.74554	2.26178	2.59546	0.039878	6.64634e-07	5.93423e-07
		27	0	4.37435	12.1853	19.6742	27.1602	0.505642	8.42737e-06	7.52444e-06													27	0.0892263	0.697588	1.5136	1.96022	2.45913	0.0382082	6.36804e-07	5.68575e-07
		28	0	4.098	12.6376	20.4442	27.7434	0.524951	8.74918e-06	7.81177e-06													28	0.0895736	0.610729	1.34768	1.77967	2.18116	0.0342885	5.71475e-07	5.10246e-07
		Franke et al measured 4.1 ± 0.7 e-6 cm/s Peapp for for free ROH in porcine BMECs with TEER between 600-800 ohms cm2																					Franke et al measured 1.0 ± 0.4 e-6 cm/s Peapp for sucrose in porcine BMECs with TEER between 600-800 ohms cm2
																							Lippman (2012) measured Pe of 5.7 e -7 cm/s
