# Supplementary material for: An in vitro model for vitamin A transport across the human blood–brain barrier
Source: eLife. 2023 Nov 7;12:RP87863. doi: 10.7554/eLife.87863 (PMC10629827; doi:10.7554/eLife.87863)
Supplement: Figure 6—source data 1. [file elife-87863-fig6-data1.xlsx]

## Sheet: Sheet1
KD and anisotropy data
										These data are plotted in Figure 6 B for muRBP
	[ROH]	Em 460 (a.u.)				[ROH]	Mean Em 460	Error		[ROH]	Buffer Corrected Mean Em 460	Error		Raw Anisotropy (a.u.)
	(nM)	Replicate 1	Replicate 2	Replicate 3		(nM)	(a.u.)	(a.u.)		(nM)	(a.u.)	(a.u.)		Sample	Replicate 1	Replicate 2	Replicate 3	Replicate 4	Replicate 5
	Buffer	404.009	438.011	387.008		Buffer	409.676	25.9691		0	1107.79	82.2301		ROH-RBP	0.200606	0.189931	0.200964	0.181303	0.19241
	0	1572.14	1552.14	1428.12		0	1517.46	78.0217		100	4056.45	115.235		ROH-RBP-TTR	0.301758	0.30467	0.300771	0.30521	0.310936
	100	4582.19	4358.07	4458.12		100	4466.13	112.271		200	6281.52	326.199		ROH-RBP-muTTR	0.201949	0.191572	0.206699	0.2031	0.207553
	200	7051.81	6601.46	6420.33		200	6691.2	325.164		300	7567.93	527.346		ROH-muRBP	0.215581	0.201303	0.200056	0.199838	0.185343
	300	7460.14	8513.09	7959.58		300	7977.61	526.707		400	8672.32	438.091		ROH-muRBP-TTR	0.213149	0.222369	0.225422	0.20279	0.204813
	400	8623.2	9128.71	9494.09		400	9082	437.32		500	9150.17	646.348
	500	8823.4	10029.7	9826.45		500	9559.84	645.826		600	10916.6	269.397		These data are plotted in Figure 6 D
	600	11620.6	11262.2	11096		600	11326.2	268.143		700	11521.7	370.065		Sample	Mean Anisotropy (a.u.)	Error (a.u.)
	700	12347.6	11643.7	11802.9		700	11931.4	369.153		800	11729	239.136		ROH-RBP	0.193043	0.00818325
	800	12064.2	12404.7	11947.1		800	12138.7	237.722		900	12376.2	834.943		ROH-RBP-TTR	0.304669	0.00397607
	900	12646	13681.6	12030.2		900	12785.9	834.539		1000	13381.1	440.229		ROH-RBP-muTTR	0.202174	0.00637776
	1000	14277.5	13671.6	13423.2		1000	13790.7	439.463		1250	13811.1	486.748		ROH-muRBP	0.200424	0.0107056
	1250	14690.2	13719.6	14252.5		1250	14220.8	486.055		1500	14063.8	119.835		ROH-muRBP-TTR	0.213709	0.0101347
	1500	14344.6	14573	14502.9		1500	14473.5	116.987
