# Supplementary material for: An in vitro model for vitamin A transport across the human blood–brain barrier
Source: eLife. 2023 Nov 7;12:RP87863. doi: 10.7554/eLife.87863 (PMC10629827; doi:10.7554/eLife.87863)
Supplement: Figure 7—source data 1. [file elife-87863-fig7-data1.xlsx]

## Sheet: ROH-RBP Accumulation
ROH-RBP Accumulation Data
	ROH Accumulation Raw CPM and Concentrations used in Figures 3A, 5A, 7A, S1
	Well #	Condition #	Replicate #	Vial #	Sample	Time (min)	Vol (uL)	3H CPM	3H DPM	3H-ROH Conc. (nM)	ROH Conc. (nM)	3H added (by DPM)	43.2962
	1	1	1	1	2000 nM ROH-RBP (equimolar)	0	100	0	0	0	0	ROH added (by concentration)	1900
	2	1	1	2	2000 nM ROH-RBP (equimolar)	5	100	1384	2486	249.692	10957.4	Sum	1943.3
	3	1	1	3	2000 nM ROH-RBP (equimolar)	10	100	1941	3481	349.628	15343	Ratio	43.8838
	4	1	1	4	2000 nM ROH-RBP (equimolar)	15	100	2632	4725	474.575	20826.1
	5	1	1	5	2000 nM ROH-RBP (equimolar)	20	100	3833	6878	690.82	30315.8		Time	Ave CPM Signal	CPM Std Dev	Ave [ROH] (uM)	Ave [ROH] Std Dev (uM)
	6	1	1	6	2000 nM ROH-RBP (equimolar)	25	100	4481	8079	811.447	35609.4		0	0	0	0	0
	7	1	1	7	2000 nM ROH-RBP (equimolar)	30	100	5247	9480	952.162	41784.5		5	1309.67	66.2143	10.3785	0.511464
	8	1	1	8	2000 nM ROH-RBP (equimolar)	35	100	5060	9109	914.9	40149.3		10	1964.33	62.3645	15.5825	0.545629
	9	1	1	9	2000 nM ROH-RBP (equimolar)	40	100	5397	9738	978.076	42921.7		15	2866.67	392.68	22.7332	3.14414
	10	1	1	10	2000 nM ROH-RBP (equimolar)	45	100	6514	11730	1178.15	51701.7		20	3596.67	301.583	28.5851	2.32754
	11	1	1	11	2000 nM ROH-RBP (equimolar)	50	100	7932	14324	1438.69	63135.1		25	4337.33	128.103	34.5001	1.00965
	12	1	1	12	2000 nM ROH-RBP (equimolar)	55	100	5774	10453	1049.89	46073.1		30	5019.33	357.738	39.9098	2.91399
	13	1	2	13	2000 nM ROH-RBP (equimolar)	0	100	0	0	0	0		35	5215	136.107	41.4701	1.15704
	14	1	2	14	2000 nM ROH-RBP (equimolar)	5	100	1288	2312	232.215	10190.5		40	5996	524.215	47.751	4.23881
	15	1	2	15	2000 nM ROH-RBP (equimolar)	10	100	1917	3448	346.314	15197.6		45	7045.33	605.782	56.1167	4.92558
	16	1	2	16	2000 nM ROH-RBP (equimolar)	15	100	3320	5981	600.726	26362.1		50	6798.67	1018.49	54.1377	8.0823
	17	1	2	17	2000 nM ROH-RBP (equimolar)	20	100	3257	5885	591.084	25939		55	6511	1089.93	51.9265	8.74243
	18	1	2	18	2000 nM ROH-RBP (equimolar)	25	100	4296	7772	780.613	34256.2		60	6167.67	262.793	49.0865	2.05502
	19	1	2	19	2000 nM ROH-RBP (equimolar)	30	100	4607	8293	832.941	36552.6		65	6343.67	256.876	50.6439	2.00573
	20	1	2	20	2000 nM ROH-RBP (equimolar)	35	100	5315	9598	964.014	42304.6		70	7625.67	451.748	60.9592	3.58975
	21	1	2	21	2000 nM ROH-RBP (equimolar)	40	100	6371	11538	1158.87	50855.4		75	7594.33	1031.63	60.5714	8.29279
	22	1	2	22	2000 nM ROH-RBP (equimolar)	45	100	7705	13937	1399.82	61429.4		80	8503.67	618.438	67.7558	4.92134
	23	1	2	23	2000 nM ROH-RBP (equimolar)	50	100	5960	10775	1082.23	47492.4		85	8580.33	1216.66	68.4743	9.76811
	24	1	2	24	2000 nM ROH-RBP (equimolar)	55	100	7763	14061	1412.27	61975.9		90	8596.33	786.204	68.5536	6.27461
	25	1	3	25	2000 nM ROH-RBP (equimolar)	0	100	0	0	0	0		95	9485	504.471	75.644	4.12995
	26	1	3	26	2000 nM ROH-RBP (equimolar)	5	100	1257	2266	227.595	9987.73		100	10420.3	1661.89	83.306	13.243
	27	1	3	27	2000 nM ROH-RBP (equimolar)	10	100	2035	3677	369.315	16206.9		105	9834.33	490.025	78.5369	3.89466
	28	1	3	28	2000 nM ROH-RBP (equimolar)	15	100	2648	4767	478.793	21011.3		110	11378.7	859.271	91.0223	6.961
	29	1	3	29	2000 nM ROH-RBP (equimolar)	20	100	3700	6693	672.239	29500.4		115	11876.7	566.384	94.7277	4.44021
	30	1	3	30	2000 nM ROH-RBP (equimolar)	25	100	4235	7631	766.451	33634.8		120	11104.3	1569.62	88.5922	12.3673
	31	1	3	31	2000 nM ROH-RBP (equimolar)	30	100	5204	9391	943.223	41392.2
	32	1	3	32	2000 nM ROH-RBP (equimolar)	35	100	5270	9519	956.08	41956.4
	33	1	3	33	2000 nM ROH-RBP (equimolar)	40	100	6220	11225	1127.43	49475.8
	34	1	3	34	2000 nM ROH-RBP (equimolar)	45	100	6917	12528	1258.3	55219
	35	1	3	35	2000 nM ROH-RBP (equimolar)	50	100	6504	11749	1180.06	51785.4
	36	1	3	36	2000 nM ROH-RBP (equimolar)	55	100	5996	10829	1087.65	47730.4
	37	1	1	37	2000 nM ROH-RBP (equimolar)	60	100	6423	11587	1163.79	51071.4
	38	1	1	38	2000 nM ROH-RBP (equimolar)	65	100	6571	11906	1195.83	52477.4
	39	1	1	39	2000 nM ROH-RBP (equimolar)	70	100	7438	13461	1352.01	59331.3
	40	1	1	40	2000 nM ROH-RBP (equimolar)	75	100	8458	15341	1540.84	67617.7
	41	1	1	41	2000 nM ROH-RBP (equimolar)	80	100	8065	14584	1464.8	64281.1
	42	1	1	42	2000 nM ROH-RBP (equimolar)	85	100	7578	13720	1378.02	60472.9
	43	1	1	43	2000 nM ROH-RBP (equimolar)	90	100	9372	16953	1702.74	74722.8
	44	1	1	44	2000 nM ROH-RBP (equimolar)	95	100	9096	16448	1652.02	72497
	45	1	1	45	2000 nM ROH-RBP (equimolar)	100	100	9400	17073	1714.8	75251.8
	46	1	1	46	2000 nM ROH-RBP (equimolar)	105	100	10162	18421	1850.19	81193.3
	47	1	1	47	2000 nM ROH-RBP (equimolar)	110	100	10553	19110	1919.39	84230.1
	48	1	1	48	2000 nM ROH-RBP (equimolar)	115	100	12018	21793	2188.87	96055.8
	49	1	2	49	2000 nM ROH-RBP (equimolar)	60	100	6182	11167	1121.6	49220.2
	50	1	2	50	2000 nM ROH-RBP (equimolar)	65	100	6395	11560	1161.08	50952.4
	51	1	2	51	2000 nM ROH-RBP (equimolar)	70	100	7298	13266	1332.42	58471.8
	52	1	2	52	2000 nM ROH-RBP (equimolar)	75	100	7873	14217	1427.94	62663.5
	53	1	2	53	2000 nM ROH-RBP (equimolar)	80	100	8235	14883	1494.83	65599
	54	1	2	54	2000 nM ROH-RBP (equimolar)	85	100	8229	14881	1494.63	65590.2
	55	1	2	55	2000 nM ROH-RBP (equimolar)	90	100	7800	14107	1416.89	62178.7
	56	1	2	56	2000 nM ROH-RBP (equimolar)	95	100	9304	16815	1688.88	74114.6
	57	1	2	57	2000 nM ROH-RBP (equimolar)	100	100	9523	17260	1733.58	76076
	58	1	2	58	2000 nM ROH-RBP (equimolar)	105	100	9271	16804	1687.78	74066.1
	59	1	2	59	2000 nM ROH-RBP (equimolar)	110	100	12268	22266	2236.38	98140.7
	60	1	2	60	2000 nM ROH-RBP (equimolar)	115	100	11253	20368	2045.74	89775
	61	1	3	61	2000 nM ROH-RBP (equimolar)	60	100	5898	10656	1070.28	46967.9
	62	1	3	62	2000 nM ROH-RBP (equimolar)	65	100	6065	11004	1105.23	48501.7
	63	1	3	63	2000 nM ROH-RBP (equimolar)	70	100	8141	14764	1482.88	65074.5
	64	1	3	64	2000 nM ROH-RBP (equimolar)	75	100	6452	11669	1172.02	51432.8
	65	1	3	65	2000 nM ROH-RBP (equimolar)	80	100	9211	16650	1672.31	73387.3
	66	1	3	66	2000 nM ROH-RBP (equimolar)	85	100	9934	18005	1808.41	79359.7
	67	1	3	67	2000 nM ROH-RBP (equimolar)	90	100	8617	15600	1566.85	68759.3
	68	1	3	68	2000 nM ROH-RBP (equimolar)	95	100	10055	18223	1830.3	80320.5
	69	1	3	69	2000 nM ROH-RBP (equimolar)	100	100	12338	22368	2246.62	98590.2
	70	1	3	70	2000 nM ROH-RBP (equimolar)	105	100	10070	18230	1831	80351.4
	71	1	3	71	2000 nM ROH-RBP (equimolar)	110	100	11315	20577	2066.73	90696.1
	72	1	3	72	2000 nM ROH-RBP (equimolar)	115	100	12359	22314	2241.2	98352.2
	73	1	1	73	2000 nM ROH-RBP (equimolar)	120	100	9302	16880	1695.41	74401.1
	74	1	2	74	2000 nM ROH-RBP (equimolar)	120	100	12171	22023	2211.97	97069.6
	75	1	3	75	2000 nM ROH-RBP (equimolar)	120	100	11840	21396	2148.99	94306
								*****	2162644	217214	9.53217e+06
								0	0	0	0
								0	0	0	0
								0	0	0	0
								0	0	0	0
								0	0	0	0
								0	0	0	0
								0	0	0	0
								0	0	0	0
								0	0	0	0
								0	0	0	0
								0	0	0	0
								0	0	0	0
								0	0	0	0
								0	0	0	0
								0	0	0	0
								0	0	0	0
								0	0	0	0
								0	0	0	0
								0	0	0	0
								0	0	0	0
	Condition 1 Vial Number			76		0	750		2162644	43.2962

## Sheet: ROH-RBP-TTR Accumulation
ROH-RBP-TTR Accumulation Data
	ROH Accumulation Raw CPM and Concentrations used in Figures 3A, 5B, 7A, S1
	Well #	Condition #	Replicate #	Vial #	Sample	Time (min)	Vol (uL)	3H CPM	3H DPM	3H-ROH Conc. (nM)	ROH Conc. (nM)	3H added (by DPM)	40.7079
	1	1	1	1	2000 nM ROH-RBP (equimolar), 4000 nM TTR	0	100	0	0	0	0	ROH added (by concentration)	1900
	2	1	1	2	2000 nM ROH-RBP (equimolar), 4000 nM TTR	5	100	1267	2268	227.796	10632.1	Sum	1940.71
	3	1	1	3	2000 nM ROH-RBP (equimolar), 4000 nM TTR	10	100	1594	2854	286.653	13379.3	Ratio	46.674
	4	1	1	4	2000 nM ROH-RBP (equimolar), 4000 nM TTR	15	100	2376	4279	429.779	20059.5
	5	1	1	5	2000 nM ROH-RBP (equimolar), 4000 nM TTR	20	100	2406	4323	434.198	20265.8		Time	Ave CPM Signal	CPM Std Dev	Ave [ROH] (uM)	Ave [ROH] Std Dev (uM)
	6	1	1	6	2000 nM ROH-RBP (equimolar), 4000 nM TTR	25	100	3079	5528	555.227	25914.7		0	0	0	0	0
	7	1	1	7	2000 nM ROH-RBP (equimolar), 4000 nM TTR	30	100	3414	6152	617.901	28839.9		5	1317.67	172.668	11.1853	1.58817
	8	1	1	8	2000 nM ROH-RBP (equimolar), 4000 nM TTR	35	100	3973	7165	719.646	33588.8		10	1714	193.311	14.4684	1.69144
	9	1	1	9	2000 nM ROH-RBP (equimolar), 4000 nM TTR	40	100	4085	7353	738.529	34470.1		15	2142	216.786	18.1187	1.79106
	10	1	1	10	2000 nM ROH-RBP (equimolar), 4000 nM TTR	45	100	4831	8707	874.523	40817.5		20	2446.67	46.9184	20.6705	0.403168
	11	1	1	11	2000 nM ROH-RBP (equimolar), 4000 nM TTR	50	100	4516	8117	815.264	38051.7		25	3002.67	182.867	25.3365	1.63048
	12	1	1	12	2000 nM ROH-RBP (equimolar), 4000 nM TTR	55	100	5226	9420	946.136	44160		30	3478	368.196	29.4259	3.17005
	13	1	2	13	2000 nM ROH-RBP (equimolar), 4000 nM TTR	0	100	0	0	0	0		35	3892.33	76.8397	32.9856	0.60712
	14	1	2	14	2000 nM ROH-RBP (equimolar), 4000 nM TTR	5	100	1510	2768	278.015	12976.1		40	4367	258.261	36.9594	2.26683
	15	1	2	15	2000 nM ROH-RBP (equimolar), 4000 nM TTR	10	100	1611	2903	291.575	13609		45	5388	643.224	45.6132	5.60376
	16	1	2	16	2000 nM ROH-RBP (equimolar), 4000 nM TTR	15	100	2102	3790	380.664	17767.1		50	5299.33	688.233	44.8366	5.95101
	17	1	2	17	2000 nM ROH-RBP (equimolar), 4000 nM TTR	20	100	2498	4495	451.474	21072.1		55	5829	668.59	49.2667	5.75935
	18	1	2	18	2000 nM ROH-RBP (equimolar), 4000 nM TTR	25	100	2794	5012	503.401	23495.7		60	6203.33	290.999	52.7138	2.62792
	19	1	2	19	2000 nM ROH-RBP (equimolar), 4000 nM TTR	30	100	3146	5672	569.69	26589.7		65	6764.33	311.14	57.3986	2.56934
	20	1	2	20	2000 nM ROH-RBP (equimolar), 4000 nM TTR	35	100	3820	6906	693.632	32374.6		70	6793	310.566	57.7893	2.65263
	21	1	2	21	2000 nM ROH-RBP (equimolar), 4000 nM TTR	40	100	4424	8000	803.513	37503.2		75	7190.67	92.8727	61.1395	0.830208
	22	1	2	22	2000 nM ROH-RBP (equimolar), 4000 nM TTR	45	100	5241	9439	948.044	44249.1		80	7341.67	396.223	62.2943	3.26141
	23	1	2	23	2000 nM ROH-RBP (equimolar), 4000 nM TTR	50	100	5807	10489	1053.51	49171.3		85	8004.33	354.128	68.0182	2.96359
	24	1	2	24	2000 nM ROH-RBP (equimolar), 4000 nM TTR	55	100	5713	10267	1031.21	48130.6		90	8302	286.03	70.4372	2.64325
	25	1	3	25	2000 nM ROH-RBP (equimolar), 4000 nM TTR	0	100	0	0	0	0		95	9647	411.902	81.9554	3.42538
	26	1	3	26	2000 nM ROH-RBP (equimolar), 4000 nM TTR	5	100	1176	2122	213.132	9947.72		100	9562.33	396.195	81.1819	3.39484
	27	1	3	27	2000 nM ROH-RBP (equimolar), 4000 nM TTR	10	100	1937	3502	351.738	16417		105	10786.3	821.018	91.5109	6.99096
	28	1	3	28	2000 nM ROH-RBP (equimolar), 4000 nM TTR	15	100	1948	3526	354.148	16529.5		110	10771	568.43	91.4609	4.59373
	29	1	3	29	2000 nM ROH-RBP (equimolar), 4000 nM TTR	20	100	2436	4410	442.936	20673.6		115	12132.7	878.233	103.082	7.47805
	30	1	3	30	2000 nM ROH-RBP (equimolar), 4000 nM TTR	25	100	3135	5674	569.891	26599.1		120	10844	491.995	92.0265	4.09813
	31	1	3	31	2000 nM ROH-RBP (equimolar), 4000 nM TTR	30	100	3874	7007	703.777	32848.1
	32	1	3	32	2000 nM ROH-RBP (equimolar), 4000 nM TTR	35	100	3884	7038	706.89	32993.4
	33	1	3	33	2000 nM ROH-RBP (equimolar), 4000 nM TTR	40	100	4592	8299	833.544	38904.8
	34	1	3	34	2000 nM ROH-RBP (equimolar), 4000 nM TTR	45	100	6092	11044	1109.25	51773.1
	35	1	3	35	2000 nM ROH-RBP (equimolar), 4000 nM TTR	50	100	5575	10087	1013.13	47286.8
	36	1	3	36	2000 nM ROH-RBP (equimolar), 4000 nM TTR	55	100	6548	11841	1189.3	55509.4
	37	1	1	37	2000 nM ROH-RBP (equimolar), 4000 nM TTR	60	100	6223	11274	1132.35	52851.3
	38	1	1	38	2000 nM ROH-RBP (equimolar), 4000 nM TTR	65	100	6921	12498	1255.29	58589.3
	39	1	1	39	2000 nM ROH-RBP (equimolar), 4000 nM TTR	70	100	7124	12931	1298.78	60619.2
	40	1	1	40	2000 nM ROH-RBP (equimolar), 4000 nM TTR	75	100	7106	12889	1294.56	60422.3
	41	1	1	41	2000 nM ROH-RBP (equimolar), 4000 nM TTR	80	100	7357	13308	1336.64	62386.5
	42	1	1	42	2000 nM ROH-RBP (equimolar), 4000 nM TTR	85	100	7980	14492	1455.56	67937
	43	1	1	43	2000 nM ROH-RBP (equimolar), 4000 nM TTR	90	100	8274	14960	1502.57	70130.9
	44	1	1	44	2000 nM ROH-RBP (equimolar), 4000 nM TTR	95	100	9950	17997	1807.6	84368.1
	45	1	1	45	2000 nM ROH-RBP (equimolar), 4000 nM TTR	100	100	9452	17112	1718.71	80219.3
	46	1	1	46	2000 nM ROH-RBP (equimolar), 4000 nM TTR	105	100	9949	18013	1809.21	84443.1
	47	1	1	47	2000 nM ROH-RBP (equimolar), 4000 nM TTR	110	100	10140	18429	1850.99	86393.2
	48	1	1	48	2000 nM ROH-RBP (equimolar), 4000 nM TTR	115	100	12069	21827	2192.28	102323
	49	1	2	49	2000 nM ROH-RBP (equimolar), 4000 nM TTR	60	100	5903	10670	1071.69	50019.9
	50	1	2	50	2000 nM ROH-RBP (equimolar), 4000 nM TTR	65	100	6406	11615	1166.6	54449.9
	51	1	2	51	2000 nM ROH-RBP (equimolar), 4000 nM TTR	70	100	6508	11809	1186.09	55359.4
	52	1	2	52	2000 nM ROH-RBP (equimolar), 4000 nM TTR	75	100	7290	13236	1329.41	62049
	53	1	2	53	2000 nM ROH-RBP (equimolar), 4000 nM TTR	80	100	6938	12583	1263.82	58987.8
	54	1	2	54	2000 nM ROH-RBP (equimolar), 4000 nM TTR	85	100	7663	13886	1394.7	65096.1
	55	1	2	55	2000 nM ROH-RBP (equimolar), 4000 nM TTR	90	100	8031	14497	1456.07	67960.4
	56	1	2	56	2000 nM ROH-RBP (equimolar), 4000 nM TTR	95	100	9813	17804	1788.22	83463.3
	57	1	2	57	2000 nM ROH-RBP (equimolar), 4000 nM TTR	100	100	9233	16718	1679.14	78372.2
	58	1	2	58	2000 nM ROH-RBP (equimolar), 4000 nM TTR	105	100	10820	19554	1963.99	91667.1
	59	1	2	59	2000 nM ROH-RBP (equimolar), 4000 nM TTR	110	100	11243	20340	2042.93	95351.8
	60	1	2	60	2000 nM ROH-RBP (equimolar), 4000 nM TTR	115	100	11288	20481	2057.09	96012.8
	61	1	3	61	2000 nM ROH-RBP (equimolar), 4000 nM TTR	60	100	6484	11790	1184.18	55270.3
	62	1	3	62	2000 nM ROH-RBP (equimolar), 4000 nM TTR	65	100	6966	12619	1267.44	59156.6
	63	1	3	63	2000 nM ROH-RBP (equimolar), 4000 nM TTR	70	100	6747	12242	1229.58	57389.2
	64	1	3	64	2000 nM ROH-RBP (equimolar), 4000 nM TTR	75	100	7176	13001	1305.81	60947.3
	65	1	3	65	2000 nM ROH-RBP (equimolar), 4000 nM TTR	80	100	7730	13974	1403.54	65508.7
	66	1	3	66	2000 nM ROH-RBP (equimolar), 4000 nM TTR	85	100	8370	15150	1521.65	71021.6
	67	1	3	67	2000 nM ROH-RBP (equimolar), 4000 nM TTR	90	100	8601	15619	1568.76	73220.2
	68	1	3	68	2000 nM ROH-RBP (equimolar), 4000 nM TTR	95	100	9178	16646	1671.91	78034.7
	69	1	3	69	2000 nM ROH-RBP (equimolar), 4000 nM TTR	100	100	10002	18122	1820.16	84954.1
	70	1	3	70	2000 nM ROH-RBP (equimolar), 4000 nM TTR	105	100	11590	20995	2108.72	98422.4
	71	1	3	71	2000 nM ROH-RBP (equimolar), 4000 nM TTR	110	100	10930	19761	1984.78	92637.5
	72	1	3	72	2000 nM ROH-RBP (equimolar), 4000 nM TTR	115	100	13041	23659	2376.29	110911
	73	1	1	73	2000 nM ROH-RBP (equimolar), 4000 nM TTR	120	100	10309	18675	1875.7	87546.5
	74	1	2	74	2000 nM ROH-RBP (equimolar), 4000 nM TTR	120	100	11277	20390	2047.95	95586.2
	75	1	3	75	2000 nM ROH-RBP (equimolar), 4000 nM TTR	120	100	10946	19827	1991.41	92946.9
								*****	2033358	204229	9.53217e+06
								0	0	0	0
								0	0	0	0
								0	0	0	0
								0	0	0	0
								0	0	0	0
								0	0	0	0
								0	0	0	0
								0	0	0	0
								0	0	0	0
								0	0	0	0
								0	0	0	0
								0	0	0	0
								0	0	0	0
								0	0	0	0
								0	0	0	0
								0	0	0	0
								0	0	0	0
								0	0	0	0
								0	0	0	0
								0	0	0	0
	Condition 1 Vial Number			76		0	750		2033358	40.7079

## Sheet: ROH-muRBP Accumulation
ROH-muRBP Accumulation Data
	ROH Accumulation Raw CPM and Concentrations used in Figures 7A, S1
	Well #	Condition #	Replicate #	Vial #	Sample	Time (min)	Vol (uL)	3H CPM	3H DPM	3H-ROH Conc. (nM)	ROH Conc. (nM)	3H added (by DPM)	75.4919
	1	1	1	1	2000 nM ROH-L63R/L64S RBP (equimolar)	0	100	0	0	0	0	ROH added (by concentration)	1900
	2	1	1	2	2000 nM ROH-L63R/L64S RBP (equimolar)	5	100	7266	13018	1307.52	32907.9	Sum	1975.49
	3	1	1	3	2000 nM ROH-L63R/L64S RBP (equimolar)	10	100	10822	19391	1947.61	49018.1	Ratio	25.1683
	4	1	1	4	2000 nM ROH-L63R/L64S RBP (equimolar)	15	100	14816	26541	2665.75	67092.4
	5	1	1	5	2000 nM ROH-L63R/L64S RBP (equimolar)	20	100	17830	31943	3208.33	80748		Time	Ave CPM Signal	CPM Std Dev	Ave [ROH] (uM)	Ave [ROH] Std Dev (uM)
	6	1	1	6	2000 nM ROH-L63R/L64S RBP (equimolar)	25	100	22655	40588	4076.62	102602		0	0	0	0	0
	7	1	1	7	2000 nM ROH-L63R/L64S RBP (equimolar)	30	100	26209	47022	4722.85	118866		5	7676	528.163	34.8535	2.46639
	8	1	1	8	2000 nM ROH-L63R/L64S RBP (equimolar)	35	100	28797	51594	5182.05	130423		10	11096	239.307	50.3924	1.19758
	9	1	1	9	2000 nM ROH-L63R/L64S RBP (equimolar)	40	100	31617	56681	5692.99	143283		15	15133	516.501	68.8333	2.49012
	10	1	1	10	2000 nM ROH-L63R/L64S RBP (equimolar)	45	100	37019	66210	6650.07	167371		20	18018	199.331	81.937	1.11141
	11	1	1	11	2000 nM ROH-L63R/L64S RBP (equimolar)	50	100	36080	64807	6509.16	163824		25	22215	845.71	100.942	3.67048
	12	1	1	12	2000 nM ROH-L63R/L64S RBP (equimolar)	55	100	42412	76003	7633.67	192126		30	25611.3	555.797	116.464	2.25131
	13	1	2	13	2000 nM ROH-L63R/L64S RBP (equimolar)	0	100	0	0	0	0		35	27906.7	808.888	126.728	3.31962
	14	1	2	14	2000 nM ROH-L63R/L64S RBP (equimolar)	5	100	7490	13460	1351.91	34025.2		40	31510	1598.19	143.296	7.63167
	15	1	2	15	2000 nM ROH-L63R/L64S RBP (equimolar)	10	100	11202	20154	2024.25	50946.9		45	35211	1593.69	159.896	6.59069
	16	1	2	16	2000 nM ROH-L63R/L64S RBP (equimolar)	15	100	15729	28358	2848.25	71685.6		50	36236	469.843	164.79	2.07678
	17	1	2	17	2000 nM ROH-L63R/L64S RBP (equimolar)	20	100	18227	32814	3295.81	82949.8		55	40288	2020.92	183.05	8.82754
	18	1	2	18	2000 nM ROH-L63R/L64S RBP (equimolar)	25	100	22750	40939	4111.88	103489		60	40001.3	905.581	182.432	3.71396
	19	1	2	19	2000 nM ROH-L63R/L64S RBP (equimolar)	30	100	25515	45938	4613.97	116126		65	40707	2231.4	185.86	10.2695
	20	1	2	20	2000 nM ROH-L63R/L64S RBP (equimolar)	35	100	27706	49751	4996.94	125764		70	42724	2013.89	195.013	9.43885
	21	1	2	21	2000 nM ROH-L63R/L64S RBP (equimolar)	40	100	29861	53670	5390.57	135671		75	42908.3	509.37	195.635	1.98208
	22	1	2	22	2000 nM ROH-L63R/L64S RBP (equimolar)	45	100	34604	62264	6253.74	157396		80	48093.7	1733.29	219.693	8.1001
	23	1	2	23	2000 nM ROH-L63R/L64S RBP (equimolar)	50	100	36764	66132	6642.24	167174		85	46337.7	1315.56	211.176	6.31144
	24	1	2	24	2000 nM ROH-L63R/L64S RBP (equimolar)	55	100	38389	69028	6933.11	174494		90	48744	381.925	222.299	1.57915
	25	1	3	25	2000 nM ROH-L63R/L64S RBP (equimolar)	0	100	0	0	0	0		95	50743.7	1066.08	231.425	4.83279
	26	1	3	26	2000 nM ROH-L63R/L64S RBP (equimolar)	5	100	8272	14885	1495.04	37627.5		100	52491.3	2132.88	239.166	10.1162
	27	1	3	27	2000 nM ROH-L63R/L64S RBP (equimolar)	10	100	11264	20259	2034.8	51212.3		105	53683	1261.2	244.544	5.13482
	28	1	3	28	2000 nM ROH-L63R/L64S RBP (equimolar)	15	100	14854	26790	2690.76	67721.9		110	54556.7	3852.69	249.512	17.8767
	29	1	3	29	2000 nM ROH-L63R/L64S RBP (equimolar)	20	100	17997	32483	3262.56	82113.1		115	56139.7	2033.71	256.312	9.63356
	30	1	3	30	2000 nM ROH-L63R/L64S RBP (equimolar)	25	100	21240	38267	3843.5	96734.3		120	57731	1551.87	263.789	7.36886
	31	1	3	31	2000 nM ROH-L63R/L64S RBP (equimolar)	30	100	25110	45256	4545.47	114402
	32	1	3	32	2000 nM ROH-L63R/L64S RBP (equimolar)	35	100	27217	49052	4926.74	123997
	33	1	3	33	2000 nM ROH-L63R/L64S RBP (equimolar)	40	100	33052	59708	5997.02	150935
	34	1	3	34	2000 nM ROH-L63R/L64S RBP (equimolar)	45	100	34010	61285	6155.41	154921
	35	1	3	35	2000 nM ROH-L63R/L64S RBP (equimolar)	50	100	35864	64628	6491.18	163372
	36	1	3	36	2000 nM ROH-L63R/L64S RBP (equimolar)	55	100	40063	72206	7252.3	182528
	37	1	1	37	2000 nM ROH-L63R/L64S RBP (equimolar)	60	100	41047	73863	7418.73	186717
	38	1	1	38	2000 nM ROH-L63R/L64S RBP (equimolar)	65	100	40327	72654	7297.3	183660
	39	1	1	39	2000 nM ROH-L63R/L64S RBP (equimolar)	70	100	40845	73607	7393.02	186070
	40	1	1	40	2000 nM ROH-L63R/L64S RBP (equimolar)	75	100	43073	77602	7794.27	196168
	41	1	1	41	2000 nM ROH-L63R/L64S RBP (equimolar)	80	100	47151	85068	8544.15	215042
	42	1	1	42	2000 nM ROH-L63R/L64S RBP (equimolar)	85	100	45354	81633	8199.14	206358
	43	1	1	43	2000 nM ROH-L63R/L64S RBP (equimolar)	90	100	48862	87905	8829.1	222213
	44	1	1	44	2000 nM ROH-L63R/L64S RBP (equimolar)	95	100	49516	89349	8974.13	225863
	45	1	1	45	2000 nM ROH-L63R/L64S RBP (equimolar)	100	100	52831	95262	9568.03	240811
	46	1	1	46	2000 nM ROH-L63R/L64S RBP (equimolar)	105	100	53027	95631	9605.09	241744
	47	1	1	47	2000 nM ROH-L63R/L64S RBP (equimolar)	110	100	51493	92942	9335.01	234946
	48	1	1	48	2000 nM ROH-L63R/L64S RBP (equimolar)	115	100	58429	105632	10609.6	267025
	49	1	2	49	2000 nM ROH-L63R/L64S RBP (equimolar)	60	100	39482	71259	7157.19	180134
	50	1	2	50	2000 nM ROH-L63R/L64S RBP (equimolar)	65	100	38690	69967	7027.42	176868
	51	1	2	51	2000 nM ROH-L63R/L64S RBP (equimolar)	70	100	42477	76780	7711.71	194090
	52	1	2	52	2000 nM ROH-L63R/L64S RBP (equimolar)	75	100	43315	78048	7839.07	197296
	53	1	2	53	2000 nM ROH-L63R/L64S RBP (equimolar)	80	100	50094	90608	9100.58	229046
	54	1	2	54	2000 nM ROH-L63R/L64S RBP (equimolar)	85	100	45827	82618	8298.08	208848
	55	1	2	55	2000 nM ROH-L63R/L64S RBP (equimolar)	90	100	48317	87332	8771.55	220765
	56	1	2	56	2000 nM ROH-L63R/L64S RBP (equimolar)	95	100	51279	92491	9289.71	233806
	57	1	2	57	2000 nM ROH-L63R/L64S RBP (equimolar)	100	100	54434	98248	9867.94	248359
	58	1	2	58	2000 nM ROH-L63R/L64S RBP (equimolar)	105	100	52885	95502	9592.13	241417
	59	1	2	59	2000 nM ROH-L63R/L64S RBP (equimolar)	110	100	53295	96574	9699.8	244127
	60	1	2	60	2000 nM ROH-L63R/L64S RBP (equimolar)	115	100	55448	100301	10074.1	253549
	61	1	3	61	2000 nM ROH-L63R/L64S RBP (equimolar)	60	100	39475	71382	7169.54	180445
	62	1	3	62	2000 nM ROH-L63R/L64S RBP (equimolar)	65	100	43104	77951	7829.33	197051
	63	1	3	63	2000 nM ROH-L63R/L64S RBP (equimolar)	70	100	44850	81048	8140.39	204879
	64	1	3	64	2000 nM ROH-L63R/L64S RBP (equimolar)	75	100	42337	76523	7685.9	193441
	65	1	3	65	2000 nM ROH-L63R/L64S RBP (equimolar)	80	100	47036	85048	8542.14	214991
	66	1	3	66	2000 nM ROH-L63R/L64S RBP (equimolar)	85	100	47832	86365	8674.42	218320
	67	1	3	67	2000 nM ROH-L63R/L64S RBP (equimolar)	90	100	49053	88580	8896.89	223919
	68	1	3	68	2000 nM ROH-L63R/L64S RBP (equimolar)	95	100	51436	92807	9321.45	234605
	69	1	3	69	2000 nM ROH-L63R/L64S RBP (equimolar)	100	100	50209	90324	9072.06	228328
	70	1	3	70	2000 nM ROH-L63R/L64S RBP (equimolar)	105	100	55137	99083	9951.81	250470
	71	1	3	71	2000 nM ROH-L63R/L64S RBP (equimolar)	110	100	58882	106596	10706.4	269462
	72	1	3	72	2000 nM ROH-L63R/L64S RBP (equimolar)	115	100	54542	98249	9868.04	248362
	73	1	1	73	2000 nM ROH-L63R/L64S RBP (equimolar)	120	100	55967	101037	10148.1	255409
	74	1	2	74	2000 nM ROH-L63R/L64S RBP (equimolar)	120	100	58886	106515	10698.3	269257
	75	1	3	75	2000 nM ROH-L63R/L64S RBP (equimolar)	120	100	58340	105504	10596.7	266701
								*****	3770819	378738	9.53217e+06
								0	0	0	0
								0	0	0	0
								0	0	0	0
								0	0	0	0
								0	0	0	0
								0	0	0	0
								0	0	0	0
								0	0	0	0
								0	0	0	0
								0	0	0	0
								0	0	0	0
								0	0	0	0
								0	0	0	0
								0	0	0	0
								0	0	0	0
								0	0	0	0
								0	0	0	0
								0	0	0	0
								0	0	0	0
								0	0	0	0
	Condition 1 Vial Number			76		0	750		3770819	75.4919

## Sheet: ROH-RBP-muTTR Accum
ROH-RBP-muTTR Accumulation Data
	ROH Accumulation Raw CPM and Concentrations used in Figures 7A, S1
	Well #	Condition #	Replicate #	Vial #	Sample	Time (min)	Vol (uL)	3H CPM	3H DPM	3H-ROH Conc. (nM)	ROH Conc. (nM)	3H added (by DPM)	22.6825
	1	1	1	1	2000 nM ROH-RBP (equimolar), 4000 nM I84A TTR	0	100	0	0	0	0	ROH added (by concentration)	1900
	2	1	1	2	2000 nM ROH-RBP (equimolar), 4000 nM I84A TTR	5	100	372	658	66.0889	5535.95	Sum	1922.68
	3	1	1	3	2000 nM ROH-RBP (equimolar), 4000 nM I84A TTR	10	100	848	1516	152.266	12754.6	Ratio	83.7652
	4	1	1	4	2000 nM ROH-RBP (equimolar), 4000 nM I84A TTR	15	100	1080	1928	193.647	16220.8
	5	1	1	5	2000 nM ROH-RBP (equimolar), 4000 nM I84A TTR	20	100	1803	3217	323.113	27065.6		Time	Ave CPM Signal	CPM Std Dev	Ave [ROH] (uM)	Ave [ROH] Std Dev (uM)
	6	1	1	6	2000 nM ROH-RBP (equimolar), 4000 nM I84A TTR	25	100	1610	2876	288.863	24196.6		0	0	0	0	0
	7	1	1	7	2000 nM ROH-RBP (equimolar), 4000 nM I84A TTR	30	100	2054	3679	369.515	30952.5		5	478.667	92.9157	7.19056	1.43925
	8	1	1	8	2000 nM ROH-RBP (equimolar), 4000 nM I84A TTR	35	100	2296	4120	413.809	34662.8		10	894.333	98.9966	13.4585	1.5123
	9	1	1	9	2000 nM ROH-RBP (equimolar), 4000 nM I84A TTR	40	100	2293	4102	412.001	34511.3		15	1324.33	213.13	19.9704	3.2659
	10	1	1	10	2000 nM ROH-RBP (equimolar), 4000 nM I84A TTR	45	100	2759	4956	497.776	41696.3		20	1747.33	101.658	26.3476	1.52107
	11	1	1	11	2000 nM ROH-RBP (equimolar), 4000 nM I84A TTR	50	100	2968	5306	532.93	44640.9		25	1914.33	281.017	28.8632	4.30121
	12	1	1	12	2000 nM ROH-RBP (equimolar), 4000 nM I84A TTR	55	100	3642	6507	653.557	54745.3		30	2219.67	178.679	33.527	2.68114
	13	1	2	13	2000 nM ROH-RBP (equimolar), 4000 nM I84A TTR	0	100	0	0	0	0		35	2651.67	462.119	39.9996	6.88466
	14	1	2	14	2000 nM ROH-RBP (equimolar), 4000 nM I84A TTR	5	100	542	969	97.3255	8152.48		40	2655.33	384.092	40.0529	5.88087
	15	1	2	15	2000 nM ROH-RBP (equimolar), 4000 nM I84A TTR	10	100	827	1477	148.349	12426.4		45	2993.33	232.522	45.3392	3.53866
	16	1	2	16	2000 nM ROH-RBP (equimolar), 4000 nM I84A TTR	15	100	1472	2638	264.958	22194.3		50	3148.33	156.404	47.5688	2.5396
	17	1	2	17	2000 nM ROH-RBP (equimolar), 4000 nM I84A TTR	20	100	1809	3254	326.829	27376.9		55	3907.67	286.364	58.9968	4.45448
	18	1	2	18	2000 nM ROH-RBP (equimolar), 4000 nM I84A TTR	25	100	2164	3883	390.005	32668.8		60	4033.67	102.007	61.1731	1.54399
	19	1	2	19	2000 nM ROH-RBP (equimolar), 4000 nM I84A TTR	30	100	2409	4315	433.395	36303.4		65	3927	294.802	59.51	4.53609
	20	1	2	20	2000 nM ROH-RBP (equimolar), 4000 nM I84A TTR	35	100	3174	5678	570.293	47770.7		70	3754.33	442.328	56.8907	6.84543
	21	1	2	21	2000 nM ROH-RBP (equimolar), 4000 nM I84A TTR	40	100	2615	4686	470.658	39424.7		75	4297.33	207.558	65.0909	3.13594
	22	1	2	22	2000 nM ROH-RBP (equimolar), 4000 nM I84A TTR	45	100	2997	5415	543.878	45558		80	4407.67	245.36	66.6249	3.80715
	23	1	2	23	2000 nM ROH-RBP (equimolar), 4000 nM I84A TTR	50	100	3230	5811	583.652	48889.7		85	4564.67	339.312	69.1853	5.09718
	24	1	2	24	2000 nM ROH-RBP (equimolar), 4000 nM I84A TTR	55	100	3870	6967	699.759	58615.4		90	4694.67	482.942	71.1709	7.46056
	25	1	3	25	2000 nM ROH-RBP (equimolar), 4000 nM I84A TTR	0	100	0	0	0	0		95	4204.33	1225.11	63.6999	18.7445
	26	1	3	26	2000 nM ROH-RBP (equimolar), 4000 nM I84A TTR	5	100	522	937	94.1114	7883.26		100	5094	488.015	77.2537	7.30753
	27	1	3	27	2000 nM ROH-RBP (equimolar), 4000 nM I84A TTR	10	100	1008	1806	181.393	15194.4		105	5802.33	539.176	87.9414	8.01988
	28	1	3	28	2000 nM ROH-RBP (equimolar), 4000 nM I84A TTR	15	100	1421	2555	256.622	21496		110	5706.33	271.716	86.2811	4.10122
	29	1	3	29	2000 nM ROH-RBP (equimolar), 4000 nM I84A TTR	20	100	1630	2924	293.684	24600.5		115	6165.33	803.984	93.3679	12.2598
	30	1	3	30	2000 nM ROH-RBP (equimolar), 4000 nM I84A TTR	25	100	1969	3533	354.851	29724.2		120	6294	529.068	95.3535	8.21409
	31	1	3	31	2000 nM ROH-RBP (equimolar), 4000 nM I84A TTR	30	100	2196	3961	397.839	33325.1
	32	1	3	32	2000 nM ROH-RBP (equimolar), 4000 nM I84A TTR	35	100	2485	4465	448.461	37565.4
	33	1	3	33	2000 nM ROH-RBP (equimolar), 4000 nM I84A TTR	40	100	3058	5494	551.812	46222.6
	34	1	3	34	2000 nM ROH-RBP (equimolar), 4000 nM I84A TTR	45	100	3224	5796	582.145	48763.5
	35	1	3	35	2000 nM ROH-RBP (equimolar), 4000 nM I84A TTR	50	100	3247	5845	587.066	49175.7
	36	1	3	36	2000 nM ROH-RBP (equimolar), 4000 nM I84A TTR	55	100	4211	7563	759.621	63629.8
	37	1	1	37	2000 nM ROH-RBP (equimolar), 4000 nM I84A TTR	60	100	4035	7268	729.991	61147.8
	38	1	1	38	2000 nM ROH-RBP (equimolar), 4000 nM I84A TTR	65	100	3723	6697	672.641	56343.8
	39	1	1	39	2000 nM ROH-RBP (equimolar), 4000 nM I84A TTR	70	100	3245	5825	585.058	49007.4
	40	1	1	40	2000 nM ROH-RBP (equimolar), 4000 nM I84A TTR	75	100	4178	7515	754.8	63225.9
	41	1	1	41	2000 nM ROH-RBP (equimolar), 4000 nM I84A TTR	80	100	4155	7450	748.271	62679.1
	42	1	1	42	2000 nM ROH-RBP (equimolar), 4000 nM I84A TTR	85	100	4456	8027	806.225	67533.5
	43	1	1	43	2000 nM ROH-RBP (equimolar), 4000 nM I84A TTR	90	100	4478	8064	809.941	67844.8
	44	1	1	44	2000 nM ROH-RBP (equimolar), 4000 nM I84A TTR	95	100	2790	4999	502.095	42058.1
	45	1	1	45	2000 nM ROH-RBP (equimolar), 4000 nM I84A TTR	100	100	4732	8542	857.951	71866.4
	46	1	1	46	2000 nM ROH-RBP (equimolar), 4000 nM I84A TTR	105	100	6197	11114	1116.28	93505.4
	47	1	1	47	2000 nM ROH-RBP (equimolar), 4000 nM I84A TTR	110	100	5877	10558	1060.44	88827.6
	48	1	1	48	2000 nM ROH-RBP (equimolar), 4000 nM I84A TTR	115	100	6904	12421	1247.55	104502
	49	1	2	49	2000 nM ROH-RBP (equimolar), 4000 nM I84A TTR	60	100	3931	7089	712.013	59641.9
	50	1	2	50	2000 nM ROH-RBP (equimolar), 4000 nM I84A TTR	65	100	3793	6832	686.2	57479.6
	51	1	2	51	2000 nM ROH-RBP (equimolar), 4000 nM I84A TTR	70	100	4042	7290	732.201	61332.9
	52	1	2	52	2000 nM ROH-RBP (equimolar), 4000 nM I84A TTR	75	100	4177	7528	756.105	63335.3
	53	1	2	53	2000 nM ROH-RBP (equimolar), 4000 nM I84A TTR	80	100	4645	8353	838.968	70276.3
	54	1	2	54	2000 nM ROH-RBP (equimolar), 4000 nM I84A TTR	85	100	4293	7740	777.398	65118.9
	55	1	2	55	2000 nM ROH-RBP (equimolar), 4000 nM I84A TTR	90	100	4358	7839	787.342	65951.8
	56	1	2	56	2000 nM ROH-RBP (equimolar), 4000 nM I84A TTR	95	100	4886	8824	886.274	74238.9
	57	1	2	57	2000 nM ROH-RBP (equimolar), 4000 nM I84A TTR	100	100	5649	10171	1021.57	85571.6
	58	1	2	58	2000 nM ROH-RBP (equimolar), 4000 nM I84A TTR	105	100	5188	9360	940.11	78748.4
	59	1	2	59	2000 nM ROH-RBP (equimolar), 4000 nM I84A TTR	110	100	5393	9693	973.556	81550.1
	60	1	2	60	2000 nM ROH-RBP (equimolar), 4000 nM I84A TTR	115	100	6283	11336	1138.58	95373.1
	61	1	3	61	2000 nM ROH-RBP (equimolar), 4000 nM I84A TTR	60	100	4135	7456	748.874	62729.5
	62	1	3	62	2000 nM ROH-RBP (equimolar), 4000 nM I84A TTR	65	100	4265	7691	772.477	64706.7
	63	1	3	63	2000 nM ROH-RBP (equimolar), 4000 nM I84A TTR	70	100	3976	7171	720.249	60331.7
	64	1	3	64	2000 nM ROH-RBP (equimolar), 4000 nM I84A TTR	75	100	4537	8167	820.286	68711.4
	65	1	3	65	2000 nM ROH-RBP (equimolar), 4000 nM I84A TTR	80	100	4423	7954	798.892	66919.4
	66	1	3	66	2000 nM ROH-RBP (equimolar), 4000 nM I84A TTR	85	100	4945	8903	894.209	74903.6
	67	1	3	67	2000 nM ROH-RBP (equimolar), 4000 nM I84A TTR	90	100	5248	9475	951.66	79716
	68	1	3	68	2000 nM ROH-RBP (equimolar), 4000 nM I84A TTR	95	100	4937	8891	893.004	74802.6
	69	1	3	69	2000 nM ROH-RBP (equimolar), 4000 nM I84A TTR	100	100	4901	8834	887.279	74323.1
	70	1	3	70	2000 nM ROH-RBP (equimolar), 4000 nM I84A TTR	105	100	6022	10884	1093.18	91570.3
	71	1	3	71	2000 nM ROH-RBP (equimolar), 4000 nM I84A TTR	110	100	5849	10515	1056.12	88465.8
	72	1	3	72	2000 nM ROH-RBP (equimolar), 4000 nM I84A TTR	115	100	5309	9536	957.787	80229.2
	73	1	1	73	2000 nM ROH-RBP (equimolar), 4000 nM I84A TTR	120	100	6247	11234	1128.33	94515
	74	1	2	74	2000 nM ROH-RBP (equimolar), 4000 nM I84A TTR	120	100	6845	12356	1241.03	103955
	75	1	3	75	2000 nM ROH-RBP (equimolar), 4000 nM I84A TTR	120	100	5790	10411	1045.67	87590.8
								583303	1132989	113796	9.53217e+06
								0	0	0	0
								0	0	0	0
								0	0	0	0
								0	0	0	0
								0	0	0	0
								0	0	0	0
								0	0	0	0
								0	0	0	0
								0	0	0	0
								0	0	0	0
								0	0	0	0
								0	0	0	0
								0	0	0	0
								0	0	0	0
								0	0	0	0
								0	0	0	0
								0	0	0	0
								0	0	0	0
								0	0	0	0
								0	0	0	0
	Condition 1 Vial Number			76		0	750		1132989	22.6825

## Sheet: Basolateral Accum Permeability
	ROH Permeability Raw CPM used in Figures 3C, 3D, 4C, 4D, 4E, 4F, 5D, 7B, 7C																					Sucrose Permeability Raw CPM used in Figures 3C, 3D, 4C, 4D, 4E, 4F, 5D, 7B, 7C
	Using CPM for mass balance											CPM * 10^-3										Using CPM for mass balance											CPM * 10^-3
			Apical, t = 0	Basolateral, t = 0	Basolateral, t = 15	Basolateral, t = 30	Basolateral, t = 45	Basolateral, t = 60	Apical, t = 60	RIPA CPM		Apical, t = 0	Basolateral, t = 0	Basolateral, t = 15	Basolateral, t = 30	Basolateral, t = 45	Basolateral, t = 60	Apical, t = 60	RIPA CPM					Apical, t = 0	Basolateral, t = 0	Basolateral, t = 15	Basolateral, t = 30	Basolateral, t = 45	Basolateral, t = 60	Apical, t = 60	RIPA CPM		Apical, t = 0	Basolateral, t = 0	Basolateral, t = 15	Basolateral, t = 30	Basolateral, t = 45	Basolateral, t = 60	Apical, t = 60	RIPA CPM
	1	100 nM ROH	227220	0	0	1180	3038	4053.8	218210	7333		227.22	0	0	1.18	3.038	4.0538	218.21	7.333			1	100 nM ROH	590780	110	1050	1775	2317.5	2481.75	603220	6703		590.78	0.11	1.05	1.775	2.3175	2.48175	603.22	6.703
	2		235000	0	0	1260	3326	4772.6	218080	7255		235	0	0	1.26	3.326	4.7726	218.08	7.255			2		608260	110	690	1339	1983.9	2278.39	602210	5862		608.26	0.11	0.69	1.339	1.9839	2.27839	602.21	5.862
	3		238900	0	0	1050	3845	4684.5	218610	8234		238.9	0	0	1.05	3.845	4.6845	218.61	8.234			3		612020	110	1080	1778	2357.8	2745.78	600110	8727		612.02	0.11	1.08	1.778	2.3578	2.74578	600.11	8.727
	4		233220	0	0	1760	4166	4976.6	219940	8827		233.22	0	0	1.76	4.166	4.9766	219.94	8.827			4		604470	110	1180	2038	2433.8	2753.38	599490	11877		604.47	0.11	1.18	2.038	2.4338	2.75338	599.49	11.877
	5	400 nM ROH	326570	0	630	2733	5403.3	7810.33	295660	13700		326.57	0	0.63	2.733	5.4033	7.81033	295.66	13.7			5	400 nM ROH	659440	100	1040	1744	2304.4	2770.44	657390	5840		659.44	0.1	1.04	1.744	2.3044	2.77044	657.39	5.84
	6		326870	0	510	2841	5934.1	8983.41	291440	13428		326.87	0	0.51	2.841	5.9341	8.98341	291.44	13.428			6		665840	100	2150	3245	3794.5	4249.45	647030	4317		665.84	0.1	2.15	3.245	3.7945	4.24945	647.03	4.317
	7		327870	0	1050	3385	6058.5	9275.85	292720	13441		327.87	0	1.05	3.385	6.0585	9.27585	292.72	13.441			7		666920	100	1400	2170	2687	3208.7	645730	3942		666.92	0.1	1.4	2.17	2.687	3.2087	645.73	3.942
	8		333210	0	1210	4081	7628.1	10262.8	300920	15282		333.21	0	1.21	4.081	7.6281	10.2628	300.92	15.282			8		666630	100	1590	2379	3167.9	3626.79	663050	5426		666.63	0.1	1.59	2.379	3.1679	3.62679	663.05	5.426
	9	2000 nM ROH	1552980	0	6270	23167	37286.7	58018.7	1171460	164429	`	1552.98	0	6.27	23.167	37.2867	58.0187	1171.46	164.429			9	2000 nM ROH	649770	90	1250	2265	2836.5	3353.65	631680	4388	`	649.77	0.09	1.25	2.265	2.8365	3.35365	631.68	4.388
	10		1537160	0	5410	19661	37406.1	57200.6	1161600	171933		1537.16	0	5.41	19.661	37.4061	57.2006	1161.6	171.933			10		645770	90	1010	2031	2733.1	3333.31	633230	5153		645.77	0.09	1.01	2.031	2.7331	3.33331	633.23	5.153
	11		1545320	0	5570	21887	37988.7	63138.9	1206340	169632		1545.32	0	5.57	21.887	37.9887	63.1389	1206.34	169.632			11		646950	90	860	1776	2367.6	3146.76	634520	4549		646.95	0.09	0.86	1.776	2.3676	3.14676	634.52	4.549
	12		1547170	0	6150	23445	43114.5	65651.4	1173190	184563		1547.17	0	6.15	23.445	43.1145	65.6514	1173.19	184.563			12		648130	90	960	1866	2556.6	3225.66	628080	5639		648.13	0.09	0.96	1.866	2.5566	3.22566	628.08	5.639
	13	ROH-RBP	1799840	0	11810	29461	47446.1	60684.6	1675540	49505		1799.84	0	11.81	29.461	47.4461	60.6846	1675.54	49.505			13	ROH-RBP	663970	100	1490	2889	3838.9	4363.89	678580	5134		663.97	0.1	1.49	2.889	3.8389	4.36389	678.58	5.134
	14		1840650	0	15650	29595	44629.5	62442.9	1688630	53723		1840.65	0	15.65	29.595	44.6295	62.4429	1688.63	53.723			14		663640	100	2210	3521	4412.1	5161.21	668090	6181		663.64	0.1	2.21	3.521	4.4121	5.16121	668.09	6.181
	15		1848140	0	16230	30003	47690.3	62709	1681030	54534		1848.14	0	16.23	30.003	47.6903	62.709	1681.03	54.534			15		670710	100	2040	3164	4116.4	4551.64	667150	5375		670.71	0.1	2.04	3.164	4.1164	4.55164	667.15	5.375
	16		1819800	0	15950	31545	49524.5	66052.4	1680830	63903		1819.8	0	15.95	31.545	49.5245	66.0524	1680.83	63.903			16		662580	100	2040	3294	4339.4	4973.94	680760	9012		662.58	0.1	2.04	3.294	4.3394	4.97394	680.76	9.012
	17	L63R/L64S RBP	1534630	0	9960	28486	43108.6	59510.9	1427660	67419		1534.63	0	9.96	28.486	43.1086	59.5109	1427.66	67.419			17	L63R/L64S RBP	639320	100	1590	3309	4200.9	5060.09	664000	5321		639.32	0.1	1.59	3.309	4.2009	5.06009	664	5.321
	18		1594580	0	13600	27710	43811	59611.1	1436750	70313		1594.58	0	13.6	27.71	43.811	59.6111	1436.75	70.313			18		651860	100	1920	3112	4161.2	4826.12	660140	5105		651.86	0.1	1.92	3.112	4.1612	4.82612	660.14	5.105
	19		1596380	0	15050	32705	47340.5	62004.1	1457580	83017		1596.38	0	15.05	32.705	47.3405	62.004	1457.58	83.017			19		654170	100	2140	3754	4505.4	5010.54	662850	5135		654.17	0.1	2.14	3.754	4.5054	5.01054	662.85	5.135
	20		1555790	0	13970	29807	44820.7	62052.1	1441910	74773		1555.79	0	13.97	29.807	44.8207	62.0521	1441.91	74.773			20		642950	100	2520	3992	4989.2	5568.92	662280	5701		642.95	0.1	2.52	3.992	4.9892	5.56892	662.28	5.701
	21	ROH-RBP-TTR	843250	0	6930	18583	30918.3	38361.8	755650	23944		843.25	0	6.93	18.583	30.9183	38.3618	755.65	23.944			21	ROH-RBP-TTR	656360	110	1120	2212	2961.2	3376.12	656310	8041		656.36	0.11	1.12	2.212	2.9612	3.37612	656.31	8.041
	22		842470	0	6090	16509	28110.9	36951.1	798550	27372		842.47	0	6.09	16.509	28.1109	36.9511	798.55	27.372			22		650940	110	1020	2172	2977.2	3417.72	668700	8644		650.94	0.11	1.02	2.172	2.9772	3.41772	668.7	8.644
	23		826470	0	6970	17557	28635.7	36473.6	778790	23654		826.47	0	6.97	17.557	28.6357	36.4736	778.79	23.654			23		657110	110	1120	2232	2963.2	3346.32	666450	7470		657.11	0.11	1.12	2.232	2.9632	3.34632	666.45	7.47
	24		842340	0	5900	16650	28085	36418.5	795800	23153		842.34	0	5.9	16.65	28.085	36.4185	795.8	23.153			24		650990	110	1080	2388	3168.8	3626.88	670190	6766		650.99	0.11	1.08	2.388	3.1688	3.62688	670.19	6.766
	25	ROH-RBP-I84A TTR	717360	0	5320	16042	28044.2	35874.4	681120	16555		717.36	0	5.32	16.042	28.0442	35.8744	681.12	16.555			25	ROH-RBP-I84A TTR	602460	110	780	1638	2463.8	2766.38	619320	5587		602.46	0.11	0.78	1.638	2.4638	2.76638	619.32	5.587
	26		724060	0	5530	17323	28372.3	36397.2	679060	15124		724.06	0	5.53	17.323	28.3723	36.3972	679.06	15.124			26		598840	110	960	2166	2806.6	3220.66	620440	4950		598.84	0.11	0.96	2.166	2.8066	3.22066	620.44	4.95
	27		736880	0	5980	16658	26895.8	37129.6	683530	15020		736.88	0	5.98	16.658	26.8958	37.1296	683.53	15.02			27		611350	110	860	1866	2416.6	3031.66	616410	5521		611.35	0.11	0.86	1.866	2.4166	3.03166	616.41	5.521
	28		731620	0	5570	17177	27787.7	37708.8	679600	15338		731.62	0	5.57	17.177	27.7877	37.7088	679.6	15.338			28		606020	110	750	1655	2185.5	2678.55	614020	5150		606.02	0.11	0.75	1.655	2.1855	2.67855	614.02	5.15
		Permeability Calculations																					Permeability Calculations
		Sample #	0	15	30	45	60	Slope (uL/min)	Slope cm3 / s	Peapp (cm/s)	Ave Pe (10^-6 cm/s)	Error											Sample #	0	15	30	45	60	Slope (uL/min)	Slope cm3 / s	Peapp (cm/s)	Ave Pe (10^-6 cm/s)	Error
		1	0	0	2.70382	6.96118	9.28876	0.219498	3.6583e-06	3.26634e-06	3.75293	0.386568	100										1	0.0911773	0.870329	1.47127	1.92094	2.05709	0.0267329	4.45549e-07	3.97811e-07	0.431931	0.0275093	100
		2	0	0	2.88885	7.62564	10.9423	0.268449	4.47415e-06	3.99478e-06													2	0.0913303	0.57289	1.11174	1.64718	1.89169	0.0299456	4.99094e-07	4.4562e-07
		3	0	0	2.40154	8.7942	10.7143	0.277092	4.61819e-06	4.12339e-06													3	0.0916499	0.899835	1.4814	1.96447	2.28773	0.0309784	5.16307e-07	4.60989e-07
		4	0	0	4.00109	9.47076	11.3135	0.243748	4.06247e-06	3.62721e-06													4	0.0917446	0.98417	1.69978	2.02989	2.29644	0.0284461	4.74101e-07	4.23305e-07
		5	0	1.06541	4.62186	9.13769	13.2083	0.272963	4.54939e-06	4.06195e-06	4.6528	0.430694	400										5	0.0760584	0.791007	1.32646	1.75269	2.10715	0.0291644	4.86074e-07	4.33994e-07	0.48291	0.0445802	400
		6	0	0.874966	4.87407	10.1807	15.4121	0.32612	5.43533e-06	4.85298e-06													6	0.0772762	1.66144	2.50761	2.93224	3.28381	0.0352784	5.87973e-07	5.24976e-07
		7	0	1.79352	5.78198	10.3486	15.8442	0.311459	5.19098e-06	4.6348e-06													7	0.0774317	1.08404	1.68027	2.08059	2.48455	0.030679	5.11316e-07	4.56532e-07
		8	0	2.0105	6.78087	12.6746	17.0524	0.340129	5.66882e-06	5.06145e-06													8	0.0754091	1.199	1.79398	2.38888	2.73493	0.0346845	5.78075e-07	5.16139e-07
		9	0	2.67615	9.88809	15.9146	24.7634	0.481922	8.03203e-06	7.17146e-06	7.67661	0.5281	2000										9	0.0712386	0.989425	1.79284	2.2452	2.65455	0.0363182	6.05304e-07	5.4045e-07	0.578828	0.0266697	2000
		10	0	2.32868	8.4629	16.1011	24.6215	0.496777	8.27962e-06	7.39252e-06													10	0.0710642	0.797499	1.60368	2.15806	2.63199	0.0403857	6.73095e-07	6.00978e-07
		11	0	2.30864	9.07165	15.7454	26.1696	0.521711	8.69519e-06	7.76356e-06													11	0.0709198	0.677678	1.39948	1.86566	2.47964	0.0391471	6.52451e-07	5.82546e-07
		12	0	2.62106	9.99199	18.3749	27.9799	0.563063	9.38438e-06	8.37891e-06													12	0.0716469	0.764234	1.48548	2.03525	2.56787	0.0397379	6.62299e-07	5.91338e-07
		13	0	3.52424	8.79149	14.1585	18.109	0.327474	5.45791e-06	4.87313e-06	4.76027	0.190254	RBP										13	0.0736833	1.09788	2.12871	2.82863	3.21546	0.0470176	7.83627e-07	6.99667e-07	0.692932	0.0424861	RBP
		14	0	4.63393	8.76302	13.2147	18.4892	0.306784	5.11307e-06	4.56524e-06													14	0.0748402	1.65397	2.63512	3.30203	3.86266	0.0486198	8.10331e-07	7.2351e-07
		15	0	4.8274	8.92399	14.1848	18.652	0.311564	5.19273e-06	4.63636e-06													15	0.0749457	1.52889	2.37128	3.08506	3.41126	0.0424059	7.06764e-07	6.3104e-07
		16	0	4.74468	9.38376	14.7322	19.6488	0.333738	5.56229e-06	4.96633e-06													16	0.0734473	1.49833	2.41935	3.18717	3.65323	0.0482168	8.03613e-07	7.17512e-07
		17	0	3.48823	9.97646	15.0976	20.8421	0.381219	6.35364e-06	5.6729e-06	5.4412	0.174897	L63R/L64S										17	0.0753012	1.19729	2.49172	3.16333	3.81031	0.0567378	9.4563e-07	8.44313e-07	0.759668	0.0613952	L63R/L64S
		18	0	4.7329	9.64329	15.2466	20.7451	0.357599	5.95999e-06	5.32142e-06													18	0.0757415	1.45424	2.35708	3.15176	3.65538	0.0493206	8.22011e-07	7.33938e-07
		19	0	5.16267	11.2189	16.2394	21.2695	0.355607	5.92678e-06	5.29177e-06													19	0.0754318	1.61424	2.83171	3.39851	3.77954	0.0470847	7.84744e-07	7.00665e-07
		20	0	4.84427	10.3359	15.5421	21.5173	0.368169	6.13615e-06	5.4787e-06													20	0.0754968	1.90252	3.01383	3.76668	4.20435	0.0510557	8.50929e-07	7.59758e-07
		21	0	4.58546	12.296	20.4581	25.3833	0.470371	7.83952e-06	6.99957e-06	6.55846	0.298774	TTR										21	0.0838019	0.853255	1.68518	2.25595	2.57205	0.0381809	6.36349e-07	5.68169e-07	0.584077	0.031284	TTR
		22	0	3.81316	10.3369	17.6012	23.1364	0.434893	7.24822e-06	6.47162e-06													22	0.0822491	0.762674	1.62405	2.22611	2.5555	0.0398702	6.64503e-07	5.93306e-07
		23	0	4.47489	11.272	18.3847	23.4168	0.426257	7.10428e-06	6.34311e-06													23	0.0825268	0.840273	1.67454	2.22312	2.51056	0.0370628	6.17714e-07	5.5153e-07
		24	0	3.70696	10.4612	17.6458	22.8817	0.431392	7.18986e-06	6.41952e-06													24	0.0820663	0.805742	1.78158	2.36411	2.70586	0.0418858	6.98097e-07	6.23301e-07
		25	0	3.90533	11.7762	20.5868	26.3349	0.507328	8.45547e-06	7.54953e-06	7.61428	0.13305	I84A										25	0.0888071	0.629723	1.32242	1.98912	2.2334	0.0365182	6.08637e-07	5.43426e-07	0.553917	0.0355567	I84A
		26	0	4.07181	12.7551	20.8909	26.7997	0.508796	8.47994e-06	7.57138e-06													26	0.0886468	0.773645	1.74554	2.26178	2.59546	0.039878	6.64634e-07	5.93423e-07
		27	0	4.37435	12.1853	19.6742	27.1602	0.505642	8.42737e-06	7.52444e-06													27	0.0892263	0.697588	1.5136	1.96022	2.45913	0.0382082	6.36804e-07	5.68575e-07
		28	0	4.098	12.6376	20.4442	27.7434	0.524951	8.74918e-06	7.81177e-06													28	0.0895736	0.610729	1.34768	1.77967	2.18116	0.0342885	5.71475e-07	5.10246e-07
		Franke et al measured 4.1 ± 0.7 e-6 cm/s Peapp for for free ROH in porcine BMECs with TEER between 600-800 ohms cm2																					Franke et al measured 1.0 ± 0.4 e-6 cm/s Peapp for sucrose in porcine BMECs with TEER between 600-800 ohms cm2
																							Lippman (2012) measured Pe of 5.7 e -7 cm/s
