# Supplementary material for: An in vitro model for vitamin A transport across the human blood–brain barrier
Source: eLife. 2023 Nov 7;12:RP87863. doi: 10.7554/eLife.87863 (PMC10629827; doi:10.7554/eLife.87863)
Supplement: Figure 8—source data 1. [file elife-87863-fig8-data1.xlsx]

## Sheet: Sheet1
																															Using 2 (100% efficiency) to start
	ACTB Raw Cq Values														ACTB						ACTB				ACTB ΔCq (Ref HBSS t = 120)						ACTB RQ 1+E^ΔCq (Ref HBSS t = 120)
	Sample	Biol Rep 1			Biol Rep 2			Biol Rep 3			Biol Rep 4				Sample	Biol Rep 1	Biol Rep 2	Biol Rep 3	Biol Rep 4		Sample	Mean	StDev		Sample	Biol Rep 1	Biol Rep 2	Biol Rep 3	Biol Rep 4		Sample	Biol Rep 1	Biol Rep 2	Biol Rep 3	Biol Rep 4
	HBSS - 0	15.78	15.24	15.22	16.68	16.79	16.27	14.74	14.74	14.23	14.59	14.93	14.22		HBSS - 0	15.4133	16.58	14.57	14.58		HBSS - 0	15.2858	0.948989		HBSS - 0	-0.5575	-1.72417	0.285833	0.275833		HBSS - 0	0.679479	0.302673	1.21911	1.21069
	HBSS	15.28	14.97	14.73	15.28	15.18	14.9	14.63	14.84	14.08	14.62	15.39	14.37		HBSS	14.9933	15.12	14.5167	14.7933		HBSS	14.8558	0.263078		HBSS	-0.1375	-0.264167	0.339167	0.0625		HBSS	0.909093	0.83268	1.26503	1.04427
	100	15.1	14.72	14.72	14.84	14.82	14.4	15.37	15.26	14.33	14.62	14.9	14.35		100	14.8467	14.6867	14.9867	14.6233		100	14.7858	0.16358		100	0.00916667	0.169167	-0.130833	0.2325		100	1.00637	1.12441	0.913304	1.17487
	400	15.47	15.12	15.01	14.75	14.77	14.24	14.62	14.58	14.12	14.69	14.96	14.31		400	15.2	14.5867	14.44	14.6533		400	14.72	0.332176		400	-0.344167	0.269167	0.415833	0.2025		400	0.787763	1.20511	1.33407	1.15069
	2000	14.77	14.72	14.62	15.39	15.27	14.83	15.34	15.4	14.94	15.1	15.39	14.76		2000	14.7033	15.1633	15.2267	15.0833		2000	15.0442	0.234669		2000	0.1525	-0.3075	-0.370833	-0.2275		2000	1.11149	0.808041	0.773336	0.854114
	RBP	15.36	15.07	14.95	15.17	15.3	14.73	15.24	15.24	14.83	15.21	15.48	14.79		RBP	15.1267	15.0667	15.1033	15.16		RBP	15.1142	0.0392876		RBP	-0.270833	-0.210833	-0.2475	-0.304167		RBP	0.828841	0.864038	0.842355	0.80991
	L63R/L64S	15.4	15.14	15.04	14.84	15.12	14.32	14.79	14.66	14.33	15.3	15.64	14.86		L63R/L64S	15.1933	14.76	14.5933	15.2667		L63R/L64S	14.9533	0.328002		L63R/L64S	-0.3375	0.0958333	0.2625	-0.410833		L63R/L64S	0.791412	1.06868	1.19956	0.752189
	TTR	15.24	15.05	14.75	15.31	15.26	14.77	15.37	15.34	14.98	14.69	15.03	14.26		TTR	15.0133	15.1133	15.23	14.66		TTR	15.0042	0.245935		TTR	-0.1575	-0.2575	-0.374167	0.195833		TTR	0.896577	0.836536	0.771551	1.14539
	I84A TTR	15.46	15.19	15.04	15.4	15.21	14.92	15.13	15.22	14.41	15.24	15.63	14.8		I84A TTR	15.23	15.1767	14.92	15.2233		I84A TTR	15.1375	0.146928		I84A TTR	-0.374167	-0.320833	-0.0641667	-0.3675		I84A TTR	0.771551	0.800607	0.956498	0.775125								Data from columns AR-AV are used to generate box-and-whisker plot in Figure 8
	STRA6 Raw Cq Values														STRA6						STRA6				STRA6 ΔCq (Ref HBSS t = 120)						STRA6 RQ 1+E^ΔCq (Ref HBSS t = 120)						STRA6 Norm. Exp. (Ref HBSS t = 120)						STRA6 Log2 Norm. Exp. (Ref HBSS t = 120)
	Sample	Biol Rep 1			Biol Rep 2			Biol Rep 3			Biol Rep 4				Sample	Biol Rep 1	Biol Rep 2	Biol Rep 3	Biol Rep 4		Sample	Mean	StDev		Sample	Biol Rep 1	Biol Rep 2	Biol Rep 3	Biol Rep 4		Sample	Biol Rep 1	Biol Rep 2	Biol Rep 3	Biol Rep 4		Sample	Biol Rep 1	Biol Rep 2	Biol Rep 3	Biol Rep 4		Sample	Biol Rep 1	Biol Rep 2	Biol Rep 3	Biol Rep 4
	HBSS - 0	22.38	21.38	21.54	24.74	24.65	24.79	22.31	21.07	22.61	23.46	20.62	21.39		HBSS - 0	21.7667	24.7267	21.9967	21.8233		HBSS - 0	22.5783	1.43556		HBSS - 0	0.343333	-2.61667	0.113333	0.286667		HBSS - 0	1.26868	0.163044	1.08172	1.21982		HBSS - 0	1.86714	0.53868	0.887304	1.00754		HBSS - 0	0.900833	-0.8925	-0.1725	0.0108333
	HBSS	24.26	21.15	20.96	23.3	21.64	21.97	22.01	20.96	21.66	23.67	20.96	22.78		HBSS	22.1233	22.3033	21.5433	22.47		HBSS	22.11	0.40343		HBSS	-0.0133333	-0.193333	0.566667	-0.36		HBSS	0.990801	0.874583	1.4811	0.779165		HBSS	1.08988	1.05032	1.1708	0.746131		HBSS	0.124167	0.0708333	0.2275	-0.4225
	100	24.26	21.45	21.58	23.34	21.16	21.51	23.58	21.76	23.47	23.03	21.58	22.13		100	22.43	22.0033	22.9367	22.2467		100	22.4042	0.395684		100	-0.32	0.106667	-0.826667	-0.136667		100	0.80107	1.07674	0.56383	0.909618		100	0.795996	0.957603	0.617353	0.77423		100	-0.329167	-0.0625	-0.695833	-0.369167
	400	22.62	22.17	21.72	24.35	22.37	22.91	22.84	20.88	22.05	23.57	20.83	23.8		400	22.17	23.21	21.9233	22.7333		400	22.5092	0.57725		400	-0.06	-1.1	0.186667	-0.623333		400	0.959264	0.466516	1.13813	0.649169		400	1.21771	0.387115	0.853128	0.564156		400	0.284167	-1.36917	-0.229167	-0.825833
	2000	23.69	21.44	22.81	22.34	21.95	22.71	23.02	21.53	22.98	22.91	21.45	23.92		2000	22.6467	22.3333	22.51	22.76		2000	22.5625	0.183815		2000	-0.536667	-0.223333	-0.4	-0.65		2000	0.689362	0.856584	0.757858	0.63728		2000	0.620212	1.06008	0.979986	0.746131		2000	-0.689167	0.0841667	-0.0291667	-0.4225
	RBP	21.38	22.13	21.86	22.38	21.67	21.65	22.16	21.08	21.76	22.73	21.53	22.05		RBP	21.79	21.9	21.6667	22.1033		RBP	21.865	0.185283		RBP	0.32	0.21	0.443333	0.00666667		RBP	1.24833	1.15669	1.35974	1.00463		RBP	1.50612	1.3387	1.61422	1.24042		RBP	0.590833	0.420833	0.690833	0.310833
	L63R/L64S	21.59	21.87	22.49	22.53	21.72	21.92	22.4	21.73	22.47	21.95	21.49	23.23		L63R/L64S	21.9833	22.0567	22.2	22.2233		L63R/L64S	22.1158	0.115032		L63R/L64S	0.126667	0.0533333	-0.09	-0.113333		L63R/L64S	1.09177	1.03766	0.939523	0.92445		L63R/L64S	1.37952	0.970971	0.783226	1.22901		L63R/L64S	0.464167	-0.0425	-0.3525	0.2975
	TTR	22.22	22.82	21.83	23.31	21.17	22.35	21.78	21.57	21.84	22.81	20.82	22.05		TTR	22.29	22.2767	21.73	21.8933		TTR	22.0475	0.280415		TTR	-0.18	-0.166667	0.38	0.216667		TTR	0.882703	0.890899	1.30134	1.16205		TTR	0.984525	1.06499	1.68666	1.01455		TTR	-0.0225	0.0908333	0.754167	0.0208333
	I84A TTR	22.41	21.9	21.93	23.32	20.91	21.8	21.87	20.96	21.71	22.17	21	22.44		I84A TTR	22.08	22.01	21.5133	21.87		I84A TTR	21.8683	0.252256		I84A TTR	0.03	0.1	0.596667	0.24		I84A TTR	1.02101	1.07177	1.51222	1.18099		I84A TTR	1.32332	1.3387	1.581	1.52362		I84A TTR	0.404167	0.420833	0.660833	0.6075
	LRAT Raw Cq Values														LRAT						LRAT				LRAT ΔCq (Ref HBSS t = 120)						LRAT RQ 1+E^ΔCq (Ref HBSS t = 120)						LRAT Norm. Exp. (Ref HBSS t = 120)						LRAT Log2 Norm. Exp. (Ref HBSS t = 120)
	Sample	Biol Rep 1			Biol Rep 2			Biol Rep 3			Biol Rep 4				Sample	Biol Rep 1	Biol Rep 2	Biol Rep 3	Biol Rep 4		Sample	Mean	StDev		Sample	Biol Rep 1	Biol Rep 2	Biol Rep 3	Biol Rep 4		Sample	Biol Rep 1	Biol Rep 2	Biol Rep 3	Biol Rep 4		Sample	Biol Rep 1	Biol Rep 2	Biol Rep 3	Biol Rep 4		Sample	Biol Rep 1	Biol Rep 2	Biol Rep 3	Biol Rep 4
	HBSS - 0	25.97	25.73	26.4	28.07	28.54	28.89	25.17	25.02	25.61	24.92	25.71	25.76		HBSS - 0	26.0333	28.5	25.2667	25.4633		HBSS - 0	26.3158	1.49197		HBSS - 0	-0.9275	-3.39417	-0.160833	-0.3575		HBSS - 0	0.525769	0.0951161	0.894508	0.780516		HBSS - 0	0.773782	0.314253	0.733736	0.644685		HBSS - 0	-0.37	-1.67	-0.446667	-0.633333
	HBSS	25.22	25.54	25.43	24.91	24.96	25.26	24.86	25.01	25.17	24.77	25.15	24.99		HBSS	25.3967	25.0433	25.0133	24.97		HBSS	25.1058	0.196212		HBSS	-0.290833	0.0625	0.0925	0.135833		HBSS	0.81743	1.04427	1.06622	1.09873		HBSS	0.899171	1.25411	0.842842	1.05214		HBSS	-0.153333	0.326667	-0.246667	0.0733333
	100	25.74	25.05	25.64	24.9	25.57	25.26	24.86	25.74	25.65	25.24	25.13	25.68		100	25.4767	25.2433	25.4167	25.35		100	25.3717	0.0999815		100	-0.370833	-0.1375	-0.310833	-0.244167		100	0.773336	0.909093	0.806176	0.844303		100	0.768438	0.808508	0.882703	0.718636		100	-0.38	-0.306667	-0.18	-0.476667
	400	25.39	25.6	25.48	25.95	25.91	25.79	24.44	25.78	25.12	24.57	24.98	25.02		400	25.49	25.8833	25.1133	24.8567		400	25.3358	0.448193		400	-0.384167	-0.7775	-0.0075	0.249167		400	0.766221	0.583377	0.994815	1.18852		400	0.972655	0.484085	0.7457	1.03288		400	-0.04	-1.04667	-0.423333	0.0466667
	2000	25.28	24.97	25.88	25.22	25.47	25.89	25.05	25.86	25.71	24.97	26.07	25.57		2000	25.3767	25.5267	25.54	25.5367		2000	25.495	0.0790921		2000	-0.270833	-0.420833	-0.434167	-0.430833		2000	0.828841	0.746993	0.740121	0.741833		2000	0.7457	0.92445	0.95705	0.868541		2000	-0.423333	-0.113333	-0.0633333	-0.203333
	RBP	26.05	25.75	26.22	25.02	26.09	25.11	25.09	25.14	25.65	25.32	26.16	25.52		RBP	26.0067	25.4067	25.2933	25.6667		RBP	25.5933	0.316789		RBP	-0.900833	-0.300833	-0.1875	-0.560833		RBP	0.535577	0.811783	0.878126	0.67791		RBP	0.646176	0.939523	1.04247	0.83702		RBP	-0.63	-0.09	0.06	-0.256667
	L63R/L64S	25.22	25.7	26.01	24.87	25.58	25.66	25.37	25.2	25.66	25.07	26.94	25.58		L63R/L64S	25.6433	25.37	25.41	25.8633		L63R/L64S	25.5717	0.228773		L63R/L64S	-0.5375	-0.264167	-0.304167	-0.7575		L63R/L64S	0.688964	0.83268	0.80991	0.59152		L63R/L64S	0.870551	0.779165	0.675175	0.786399		L63R/L64S	-0.2	-0.36	-0.566667	-0.346667
	TTR	24.63	23.88	24.95	24.86	24.71	24.24	24.15	24.81	24.24	24.54	25.16	24.68		TTR	24.4867	24.6033	24.4	24.7933		TTR	24.5708	0.170128		TTR	0.619167	0.5025	0.705833	0.3125		TTR	1.53599	1.41667	1.63109	1.24186		TTR	1.71317	1.69349	2.11404	1.08423		TTR	0.776667	0.76	1.08	0.116667
	I84A TTR	24.6	24.16	25.29	24.04	23.88	24.76	23.95	24.3	24.2	24.19	24.67	24.56		I84A TTR	24.6833	24.2267	24.15	24.4733		I84A TTR	24.3833	0.24296		I84A TTR	0.4225	0.879167	0.955833	0.6325		I84A TTR	1.34025	1.83931	1.9397	1.55025		I84A TTR	1.73708	2.2974	2.02792	2		I84A TTR	0.796667	1.2	1.02	1
	CRBP1 Raw Cq Values														RBP1						RBP1				RBP1 ΔCq (Ref HBSS t = 120)						RBP1 RQ 1+E^ΔCq (Ref HBSS t = 120)						RBP1 Norm. Exp. (Ref HBSS t = 120)						RBP1 Log2 Norm. Exp. (Ref HBSS t = 120)
	Sample	Biol Rep 1			Biol Rep 2			Biol Rep 3			Biol Rep 4				Sample	Biol Rep 1	Biol Rep 2	Biol Rep 3	Biol Rep 4		Sample	Mean	StDev		Sample	Biol Rep 1	Biol Rep 2	Biol Rep 3	Biol Rep 4		Sample	Biol Rep 1	Biol Rep 2	Biol Rep 3	Biol Rep 4		Sample	Biol Rep 1	Biol Rep 2	Biol Rep 3	Biol Rep 4		Sample	Biol Rep 1	Biol Rep 2	Biol Rep 3	Biol Rep 4
	HBSS - 0	18.76	18.51	17.94	21.38	20.81	20.65	19.71	18.86	19.4	19.86	18.3	18.91		HBSS - 0	18.4033	20.9467	19.3233	19.0233		HBSS - 0	19.4242	1.08489		HBSS - 0	0.7125	-1.83083	-0.2075	0.0925		HBSS - 0	1.63864	0.281102	0.866037	1.06622		HBSS - 0	2.41162	0.928731	0.710382	0.880666		HBSS - 0	1.27	-0.106667	-0.493333	-0.183333
	HBSS	19.39	19.11	18.79	19.43	18.86	18.69	19.68	18.85	18.86	19.98	18.77	18.98		HBSS	19.0967	18.9933	19.13	19.2433		HBSS	19.1158	0.103006		HBSS	0.0191667	0.1225	-0.0141667	-0.1275		HBSS	1.01337	1.08862	0.990228	0.915416		HBSS	1.11471	1.30737	0.782773	0.876606		HBSS	0.156667	0.386667	-0.353333	-0.19
	100	19.38	19.18	18.79	19.61	18.93	18.79	19.51	18.86	18.84	19.81	18.78	18.93		100	19.1167	19.11	19.07	19.1733		100	19.1175	0.0425463		100	-0.000833333	0.00583333	0.0458333	-0.0575		100	0.999423	1.00405	1.03228	0.960928		100	0.993092	0.89296	1.13027	0.817902		100	-0.01	-0.163333	0.176667	-0.29
	400	19.53	19.39	18.93	19.7	19.09	18.84	19.55	18.86	18.8	19.72	18.31	18.48		400	19.2833	19.21	19.07	18.8367		400	19.1	0.196601		400	-0.1675	-0.0941667	0.0458333	0.279167		400	0.890384	0.936813	1.03228	1.21349		400	1.13027	0.777366	0.773782	1.05458		400	0.176667	-0.363333	-0.37	0.0766667
	2000	19.38	19	18.74	19.54	18.89	18.77	19.64	18.79	18.92	19.97	18.73	19.15		2000	19.04	19.0667	19.1167	19.2833		2000	19.1267	0.109172		2000	0.0758333	0.0491667	-0.000833333	-0.1675		2000	1.05397	1.03467	0.999423	0.890384		2000	0.948246	1.28046	1.29235	1.04247		2000	-0.0766667	0.356667	0.37	0.06
	RBP	18.91	18.62	18.11	19.72	18.86	18.76	19.69	18.33	18.74	19.93	18.29	18.99		RBP	18.5467	19.1133	18.92	19.07		RBP	18.9125	0.257572		RBP	0.569167	0.0025	0.195833	0.0458333		RBP	1.48367	1.00173	1.14539	1.03228		RBP	1.79005	1.15936	1.35974	1.27456		RBP	0.84	0.213333	0.443333	0.35
	L63R/L64S	19.37	19.15	18.79	19.29	18.27	18.18	19.59	18.82	18.77	19.91	18.71	19.02		L63R/L64S	19.1033	18.58	19.06	19.2133		L63R/L64S	18.9892	0.280309		L63R/L64S	0.0125	0.535833	0.0558333	-0.0975		L63R/L64S	1.0087	1.44978	1.03946	0.934651		L63R/L64S	1.27456	1.3566	0.866537	1.24258		L63R/L64S	0.35	0.44	-0.206667	0.313333
	TTR	18.98	18.79	18.13	19.65	18.99	18.87	19.47	18.77	18.76	20	18.69	19.15		TTR	18.6333	19.17	19	19.28		TTR	19.0208	0.282848		TTR	0.4825	-0.0541667	0.115833	-0.164167		TTR	1.39716	0.963151	1.0836	0.892444		TTR	1.55833	1.15136	1.40444	0.779165		TTR	0.64	0.203333	0.49	-0.36
	I84A TTR	19.42	19.09	18.68	19.4	18.81	18.76	19.52	18.69	18.8	20.08	18.87	19.08		I84A TTR	19.0633	18.99	19.0033	19.3433		I84A TTR	19.1	0.165328		I84A TTR	0.0525	0.125833	0.1125	-0.2275		I84A TTR	1.03706	1.09114	1.0811	0.854114		I84A TTR	1.34412	1.36289	1.13027	1.10191		I84A TTR	0.426667	0.446667	0.176667	0.14
